# Supplementary material
Source: publisher figshare collection journal article supplement (https://karger.figshare.com/ndownloader/files/26943758)
Supplement: Supplementary file 1 [file 26943758]

**Variants in *ACE2* and** ***TMPRSS2* genes are not major determinants of COVID-19 severity in UK Biobank subjects**

David Curtis [*d.curtis@ucl.ac.uk*](mailto:d.curtis@ucl.ac.uk)

**Supplementary Table 1**

Table showing genotype counts and allele frequencies for variants in *ACE2* and *TMPRSS2*in cases tested positive for SARS-CoV-2, presumed to have severe illness, against background controls. Each variant is assigned a weight, with higher weights for variants which are rarer and/or with predicted damaging effects. For variants in *ACE2*, which is on the X chromosome, males are treated as homozygotes. To preserve subject anonymity, variant positions and annotations are redacted.

**Supplementary Table 1A**

Genotype counts and frequencies for variants in *ACE2*.

| Locus | contAA | contAB | contBB | contFreq | caseAA | caseAB | caseBB | caseFreq | weight |
| --- | --- | --- | --- | --- | --- | --- | --- | --- | --- |
| 1 | 49858 | 1 | 0 | 0.000010 | 82 | 0 | 0 | 0.000000 | 30.00 |
| 2 | 49012 | 472 | 236 | 0.009493 | 78 | 2 | 0 | 0.012500 | 28.98 |
| 3 | 49704 | 8 | 0 | 0.000080 | 82 | 0 | 0 | 0.000000 | 29.99 |
| 4 | 49619 | 1 | 0 | 0.000010 | 81 | 0 | 0 | 0.000000 | 30.00 |
| 5 | 49360 | 9 | 0 | 0.000091 | 81 | 0 | 0 | 0.000000 | 29.99 |
| 6 | 49743 | 88 | 3 | 0.000943 | 82 | 0 | 0 | 0.000000 | 29.90 |
| 7 | 49854 | 7 | 1 | 0.000090 | 82 | 0 | 0 | 0.000000 | 29.99 |
| 8 | 49864 | 1 | 0 | 0.000010 | 82 | 0 | 0 | 0.000000 | 30.00 |
| 9 | 49083 | 474 | 308 | 0.010930 | 78 | 2 | 2 | 0.036585 | 28.83 |
| 10 | 49869 | 2 | 0 | 0.000020 | 82 | 0 | 0 | 0.000000 | 30.00 |
| 11 | 49870 | 1 | 0 | 0.000010 | 82 | 0 | 0 | 0.000000 | 50.00 |
| 12 | 49870 | 1 | 0 | 0.000010 | 82 | 0 | 0 | 0.000000 | 50.00 |
| 13 | 49868 | 2 | 1 | 0.000040 | 82 | 0 | 0 | 0.000000 | 49.99 |
| 14 | 49863 | 6 | 1 | 0.000080 | 82 | 0 | 0 | 0.000000 | 49.99 |
| 15 | 49870 | 1 | 0 | 0.000010 | 82 | 0 | 0 | 0.000000 | 50.00 |
| 16 | 49859 | 10 | 2 | 0.000140 | 82 | 0 | 0 | 0.000000 | 49.97 |
| 17 | 49870 | 1 | 0 | 0.000010 | 82 | 0 | 0 | 0.000000 | 50.00 |
| 18 | 49870 | 1 | 0 | 0.000010 | 82 | 0 | 0 | 0.000000 | 50.00 |
| 19 | 49869 | 1 | 1 | 0.000030 | 82 | 0 | 0 | 0.000000 | 49.99 |
| 20 | 49870 | 1 | 0 | 0.000010 | 82 | 0 | 0 | 0.000000 | 50.00 |
| 21 | 49870 | 1 | 0 | 0.000010 | 82 | 0 | 0 | 0.000000 | 50.00 |
| 22 | 49870 | 1 | 0 | 0.000010 | 82 | 0 | 0 | 0.000000 | 50.00 |
| 23 | 49870 | 1 | 0 | 0.000010 | 82 | 0 | 0 | 0.000000 | 50.00 |
| 24 | 49846 | 2 | 0 | 0.000020 | 82 | 0 | 0 | 0.000000 | 99.99 |
| 25 | 49862 | 7 | 2 | 0.000110 | 82 | 0 | 0 | 0.000000 | 49.98 |
| 26 | 49814 | 37 | 19 | 0.000752 | 82 | 0 | 0 | 0.000000 | 49.86 |
| 27 | 49866 | 3 | 2 | 0.000070 | 82 | 0 | 0 | 0.000000 | 49.99 |
| 28 | 49865 | 3 | 3 | 0.000090 | 82 | 0 | 0 | 0.000000 | 49.98 |
| 29 | 49870 | 1 | 0 | 0.000010 | 82 | 0 | 0 | 0.000000 | 50.00 |
| 30 | 49870 | 1 | 0 | 0.000010 | 82 | 0 | 0 | 0.000000 | 50.00 |
| 31 | 49867 | 2 | 2 | 0.000060 | 82 | 0 | 0 | 0.000000 | 49.99 |
| 32 | 49869 | 2 | 0 | 0.000020 | 82 | 0 | 0 | 0.000000 | 30.00 |
| 33 | 49868 | 2 | 1 | 0.000040 | 82 | 0 | 0 | 0.000000 | 30.00 |
| 34 | 49860 | 2 | 0 | 0.000020 | 82 | 0 | 0 | 0.000000 | 30.00 |
| 35 | 49846 | 4 | 0 | 0.000040 | 82 | 0 | 0 | 0.000000 | 30.00 |
| 36 | 49497 | 1 | 0 | 0.000010 | 81 | 0 | 0 | 0.000000 | 30.00 |
| 37 | 49620 | 1 | 0 | 0.000010 | 81 | 0 | 0 | 0.000000 | 30.00 |
| 38 | 49460 | 120 | 7 | 0.001351 | 81 | 0 | 0 | 0.000000 | 29.85 |
| 39 | 49729 | 1 | 0 | 0.000010 | 81 | 0 | 0 | 0.000000 | 30.00 |
| 40 | 49811 | 4 | 0 | 0.000040 | 82 | 0 | 0 | 0.000000 | 30.00 |
| 41 | 49869 | 1 | 1 | 0.000030 | 82 | 0 | 0 | 0.000000 | 49.99 |
| 42 | 49870 | 1 | 0 | 0.000010 | 82 | 0 | 0 | 0.000000 | 50.00 |
| 43 | 49870 | 1 | 0 | 0.000010 | 82 | 0 | 0 | 0.000000 | 50.00 |
| 44 | 49863 | 3 | 0 | 0.000030 | 82 | 0 | 0 | 0.000000 | 49.99 |
| 45 | 49860 | 1 | 0 | 0.000010 | 82 | 0 | 0 | 0.000000 | 50.00 |
| 46 | 49830 | 1 | 0 | 0.000010 | 82 | 0 | 0 | 0.000000 | 30.00 |
| 47 | 49825 | 1 | 0 | 0.000010 | 82 | 0 | 0 | 0.000000 | 30.00 |
| 48 | 49823 | 1 | 0 | 0.000010 | 82 | 0 | 0 | 0.000000 | 30.00 |
| 49 | 49762 | 32 | 5 | 0.000422 | 82 | 0 | 0 | 0.000000 | 29.95 |
| 50 | 49676 | 11 | 0 | 0.000111 | 81 | 0 | 0 | 0.000000 | 29.99 |
| 51 | 49647 | 2 | 0 | 0.000020 | 81 | 0 | 0 | 0.000000 | 30.00 |
| 52 | 49627 | 3 | 0 | 0.000030 | 81 | 0 | 0 | 0.000000 | 30.00 |
| 53 | 49581 | 1 | 0 | 0.000010 | 81 | 0 | 0 | 0.000000 | 30.00 |
| 54 | 49270 | 2 | 0 | 0.000020 | 80 | 0 | 0 | 0.000000 | 30.00 |
| 55 | 48856 | 2 | 0 | 0.000020 | 76 | 0 | 0 | 0.000000 | 30.00 |
| 56 | 49274 | 2 | 0 | 0.000020 | 76 | 0 | 0 | 0.000000 | 30.00 |
| 57 | 49662 | 5 | 0 | 0.000050 | 79 | 0 | 0 | 0.000000 | 29.99 |
| 58 | 49692 | 2 | 0 | 0.000020 | 80 | 0 | 0 | 0.000000 | 30.00 |
| 59 | 49810 | 11 | 0 | 0.000110 | 81 | 0 | 0 | 0.000000 | 29.99 |
| 60 | 49128 | 440 | 217 | 0.008778 | 77 | 2 | 2 | 0.037037 | 29.06 |
| 61 | 49567 | 207 | 71 | 0.003501 | 82 | 0 | 0 | 0.000000 | 49.37 |
| 62 | 49864 | 6 | 0 | 0.000060 | 82 | 0 | 0 | 0.000000 | 49.99 |
| 63 | 49866 | 3 | 0 | 0.000030 | 82 | 0 | 0 | 0.000000 | 49.99 |
| 64 | 49863 | 3 | 0 | 0.000030 | 82 | 0 | 0 | 0.000000 | 49.99 |
| 65 | 49809 | 1 | 0 | 0.000010 | 82 | 0 | 0 | 0.000000 | 30.00 |
| 66 | 49446 | 1 | 0 | 0.000010 | 81 | 0 | 0 | 0.000000 | 30.00 |
| 67 | 49406 | 2 | 0 | 0.000020 | 81 | 0 | 0 | 0.000000 | 30.00 |
| 68 | 49368 | 1 | 0 | 0.000010 | 81 | 0 | 0 | 0.000000 | 30.00 |
| 69 | 48944 | 2 | 0 | 0.000020 | 81 | 0 | 0 | 0.000000 | 30.00 |
| 70 | 49838 | 3 | 0 | 0.000030 | 82 | 0 | 0 | 0.000000 | 30.00 |
| 71 | 49827 | 21 | 0 | 0.000211 | 82 | 0 | 0 | 0.000000 | 29.98 |
| 72 | 49867 | 2 | 0 | 0.000020 | 82 | 0 | 0 | 0.000000 | 50.00 |
| 73 | 49852 | 2 | 0 | 0.000020 | 82 | 0 | 0 | 0.000000 | 30.00 |
| 74 | 48530 | 4 | 0 | 0.000041 | 76 | 0 | 0 | 0.000000 | 30.00 |
| 75 | 49438 | 1 | 0 | 0.000010 | 81 | 0 | 0 | 0.000000 | 30.00 |
| 76 | 49474 | 3 | 0 | 0.000030 | 81 | 0 | 0 | 0.000000 | 30.00 |
| 77 | 49868 | 2 | 0 | 0.000020 | 82 | 0 | 0 | 0.000000 | 50.00 |
| 78 | 49859 | 1 | 0 | 0.000010 | 82 | 0 | 0 | 0.000000 | 50.00 |
| 79 | 49762 | 3 | 0 | 0.000030 | 82 | 0 | 0 | 0.000000 | 30.00 |
| 80 | 49758 | 4 | 0 | 0.000040 | 82 | 0 | 0 | 0.000000 | 30.00 |
| 81 | 49585 | 1 | 0 | 0.000010 | 82 | 0 | 0 | 0.000000 | 30.00 |
| 82 | 49447 | 1 | 0 | 0.000010 | 82 | 0 | 0 | 0.000000 | 30.00 |
| 83 | 49290 | 2 | 0 | 0.000020 | 82 | 0 | 0 | 0.000000 | 30.00 |
| 84 | 48167 | 2 | 0 | 0.000021 | 77 | 0 | 0 | 0.000000 | 30.00 |
| 85 | 48545 | 2 | 0 | 0.000021 | 80 | 0 | 0 | 0.000000 | 30.00 |
| 86 | 49296 | 1 | 0 | 0.000010 | 80 | 0 | 0 | 0.000000 | 30.00 |
| 87 | 49592 | 1 | 0 | 0.000010 | 81 | 0 | 0 | 0.000000 | 30.00 |
| 88 | 49650 | 3 | 0 | 0.000030 | 81 | 0 | 0 | 0.000000 | 30.00 |
| 89 | 49742 | 1 | 0 | 0.000010 | 82 | 0 | 0 | 0.000000 | 50.00 |
| 90 | 49752 | 3 | 0 | 0.000030 | 82 | 0 | 0 | 0.000000 | 199.98 |
| 91 | 49777 | 1 | 0 | 0.000010 | 82 | 0 | 0 | 0.000000 | 50.00 |
| 92 | 49763 | 22 | 0 | 0.000221 | 82 | 0 | 0 | 0.000000 | 199.84 |
| 93 | 49827 | 7 | 0 | 0.000070 | 82 | 0 | 0 | 0.000000 | 49.99 |
| 94 | 49859 | 4 | 0 | 0.000040 | 82 | 0 | 0 | 0.000000 | 49.99 |
| 95 | 49862 | 4 | 0 | 0.000040 | 82 | 0 | 0 | 0.000000 | 49.99 |
| 96 | 49864 | 2 | 0 | 0.000020 | 82 | 0 | 0 | 0.000000 | 50.00 |
| 97 | 49868 | 1 | 0 | 0.000010 | 82 | 0 | 0 | 0.000000 | 149.99 |
| 98 | 49843 | 6 | 1 | 0.000080 | 82 | 0 | 0 | 0.000000 | 29.99 |
| 99 | 49846 | 6 | 0 | 0.000060 | 82 | 0 | 0 | 0.000000 | 29.99 |
| 100 | 49313 | 4 | 0 | 0.000041 | 82 | 0 | 0 | 0.000000 | 30.00 |
| 101 | 48760 | 237 | 18 | 0.002785 | 82 | 0 | 0 | 0.000000 | 29.70 |
| 102 | 49099 | 1 | 0 | 0.000010 | 82 | 0 | 0 | 0.000000 | 30.00 |
| 103 | 49295 | 1 | 0 | 0.000010 | 81 | 0 | 0 | 0.000000 | 30.00 |
| 104 | 49801 | 22 | 4 | 0.000301 | 82 | 0 | 0 | 0.000000 | 29.97 |
| 105 | 49856 | 4 | 0 | 0.000040 | 82 | 0 | 0 | 0.000000 | 30.00 |
| 106 | 49861 | 8 | 0 | 0.000080 | 82 | 0 | 0 | 0.000000 | 49.99 |
| 107 | 49869 | 2 | 0 | 0.000020 | 82 | 0 | 0 | 0.000000 | 50.00 |
| 108 | 49862 | 6 | 2 | 0.000100 | 82 | 0 | 0 | 0.000000 | 49.98 |
| 109 | 49866 | 4 | 1 | 0.000060 | 82 | 0 | 0 | 0.000000 | 49.99 |
| 110 | 49869 | 2 | 0 | 0.000020 | 81 | 1 | 0 | 0.006098 | 49.99 |
| 111 | 49785 | 1 | 0 | 0.000010 | 81 | 0 | 0 | 0.000000 | 30.00 |
| 112 | 49635 | 1 | 0 | 0.000010 | 80 | 0 | 0 | 0.000000 | 30.00 |
| 113 | 49382 | 8 | 0 | 0.000081 | 80 | 0 | 0 | 0.000000 | 29.99 |
| 114 | 49246 | 16 | 0 | 0.000162 | 80 | 0 | 0 | 0.000000 | 29.98 |
| 115 | 48167 | 10 | 0 | 0.000104 | 78 | 0 | 0 | 0.000000 | 29.99 |
| 116 | 48052 | 43 | 0 | 0.000447 | 78 | 0 | 0 | 0.000000 | 29.95 |
| 117 | 49576 | 2 | 0 | 0.000020 | 82 | 0 | 0 | 0.000000 | 30.00 |
| 118 | 49607 | 37 | 2 | 0.000413 | 82 | 0 | 0 | 0.000000 | 29.96 |
| 119 | 49833 | 1 | 0 | 0.000010 | 82 | 0 | 0 | 0.000000 | 30.00 |
| 120 | 49869 | 2 | 0 | 0.000020 | 82 | 0 | 0 | 0.000000 | 30.00 |
| 121 | 49859 | 10 | 2 | 0.000140 | 82 | 0 | 0 | 0.000000 | 29.98 |
| 122 | 49868 | 3 | 0 | 0.000030 | 82 | 0 | 0 | 0.000000 | 30.00 |
| 123 | 49870 | 1 | 0 | 0.000010 | 82 | 0 | 0 | 0.000000 | 50.00 |
| 124 | 49616 | 186 | 69 | 0.003248 | 79 | 2 | 1 | 0.024390 | 49.41 |
| 125 | 49869 | 1 | 1 | 0.000030 | 82 | 0 | 0 | 0.000000 | 49.99 |
| 126 | 49870 | 1 | 0 | 0.000010 | 82 | 0 | 0 | 0.000000 | 50.00 |
| 127 | 49869 | 2 | 0 | 0.000020 | 82 | 0 | 0 | 0.000000 | 30.00 |
| 128 | 49870 | 1 | 0 | 0.000010 | 82 | 0 | 0 | 0.000000 | 30.00 |
| 129 | 48028 | 2 | 0 | 0.000021 | 79 | 0 | 0 | 0.000000 | 30.00 |
| 130 | 48764 | 1 | 0 | 0.000010 | 80 | 0 | 0 | 0.000000 | 30.00 |
| 131 | 48908 | 1 | 0 | 0.000010 | 80 | 0 | 0 | 0.000000 | 30.00 |
| 132 | 49255 | 1 | 0 | 0.000010 | 82 | 0 | 0 | 0.000000 | 30.00 |
| 133 | 49402 | 164 | 11 | 0.001876 | 80 | 1 | 0 | 0.006173 | 29.80 |
| 134 | 49810 | 2 | 0 | 0.000020 | 82 | 0 | 0 | 0.000000 | 30.00 |
| 135 | 49849 | 1 | 0 | 0.000010 | 82 | 0 | 0 | 0.000000 | 30.00 |
| 136 | 49866 | 3 | 1 | 0.000050 | 82 | 0 | 0 | 0.000000 | 49.99 |
| 137 | 49868 | 2 | 0 | 0.000020 | 82 | 0 | 0 | 0.000000 | 50.00 |
| 138 | 49842 | 14 | 10 | 0.000341 | 82 | 0 | 0 | 0.000000 | 49.94 |
| 139 | 49869 | 1 | 1 | 0.000030 | 82 | 0 | 0 | 0.000000 | 49.99 |
| 140 | 49870 | 1 | 0 | 0.000010 | 82 | 0 | 0 | 0.000000 | 50.00 |
| 141 | 49866 | 3 | 1 | 0.000050 | 82 | 0 | 0 | 0.000000 | 49.99 |
| 142 | 49870 | 1 | 0 | 0.000010 | 82 | 0 | 0 | 0.000000 | 50.00 |
| 143 | 49870 | 1 | 0 | 0.000010 | 82 | 0 | 0 | 0.000000 | 50.00 |
| 144 | 49870 | 1 | 0 | 0.000010 | 82 | 0 | 0 | 0.000000 | 50.00 |
| 145 | 49870 | 1 | 0 | 0.000010 | 82 | 0 | 0 | 0.000000 | 50.00 |
| 146 | 49870 | 1 | 0 | 0.000010 | 82 | 0 | 0 | 0.000000 | 50.00 |
| 147 | 49867 | 3 | 1 | 0.000050 | 81 | 0 | 1 | 0.012195 | 49.99 |
| 148 | 49849 | 18 | 3 | 0.000241 | 82 | 0 | 0 | 0.000000 | 49.96 |
| 149 | 49870 | 1 | 0 | 0.000010 | 82 | 0 | 0 | 0.000000 | 30.00 |
| 150 | 49803 | 11 | 1 | 0.000130 | 81 | 1 | 0 | 0.006098 | 29.98 |
| 151 | 49473 | 5 | 0 | 0.000051 | 82 | 0 | 0 | 0.000000 | 29.99 |
| 152 | 48983 | 4 | 0 | 0.000041 | 82 | 0 | 0 | 0.000000 | 30.00 |
| 153 | 49272 | 17 | 0 | 0.000172 | 81 | 0 | 0 | 0.000000 | 29.98 |
| 154 | 49358 | 1 | 0 | 0.000010 | 81 | 0 | 0 | 0.000000 | 30.00 |
| 155 | 49767 | 2 | 0 | 0.000020 | 82 | 0 | 0 | 0.000000 | 30.00 |
| 156 | 49860 | 1 | 0 | 0.000010 | 82 | 0 | 0 | 0.000000 | 30.00 |
| 157 | 49865 | 1 | 0 | 0.000010 | 82 | 0 | 0 | 0.000000 | 30.00 |
| 158 | 49869 | 2 | 0 | 0.000020 | 82 | 0 | 0 | 0.000000 | 50.00 |
| 159 | 49849 | 6 | 0 | 0.000060 | 81 | 0 | 0 | 0.000000 | 29.99 |
| 160 | 49850 | 5 | 0 | 0.000050 | 81 | 0 | 0 | 0.000000 | 29.99 |
| 161 | 49848 | 2 | 0 | 0.000020 | 81 | 0 | 0 | 0.000000 | 30.00 |
| 162 | 49530 | 3 | 0 | 0.000030 | 81 | 0 | 0 | 0.000000 | 30.00 |
| 163 | 49496 | 1 | 0 | 0.000010 | 81 | 0 | 0 | 0.000000 | 30.00 |
| 164 | 49482 | 1 | 0 | 0.000010 | 81 | 0 | 0 | 0.000000 | 30.00 |
| 165 | 49360 | 25 | 2 | 0.000294 | 80 | 0 | 0 | 0.000000 | 29.97 |
| 166 | 49280 | 3 | 0 | 0.000030 | 80 | 0 | 0 | 0.000000 | 30.00 |
| 167 | 49281 | 3 | 0 | 0.000030 | 80 | 0 | 0 | 0.000000 | 30.00 |
| 168 | 47524 | 2 | 0 | 0.000021 | 80 | 0 | 0 | 0.000000 | 30.00 |
| 169 | 49694 | 3 | 0 | 0.000030 | 82 | 0 | 0 | 0.000000 | 30.00 |
| 170 | 49869 | 2 | 0 | 0.000020 | 82 | 0 | 0 | 0.000000 | 50.00 |
| 171 | 49865 | 4 | 2 | 0.000080 | 82 | 0 | 0 | 0.000000 | 49.99 |
| 172 | 49869 | 1 | 1 | 0.000030 | 82 | 0 | 0 | 0.000000 | 49.99 |
| 173 | 49869 | 2 | 0 | 0.000020 | 82 | 0 | 0 | 0.000000 | 50.00 |
| 174 | 49870 | 1 | 0 | 0.000010 | 82 | 0 | 0 | 0.000000 | 50.00 |
| 175 | 49860 | 3 | 0 | 0.000030 | 82 | 0 | 0 | 0.000000 | 49.99 |
| 176 | 49786 | 4 | 0 | 0.000040 | 82 | 0 | 0 | 0.000000 | 49.99 |
| 177 | 49609 | 2 | 0 | 0.000020 | 82 | 0 | 0 | 0.000000 | 30.00 |
| 178 | 49501 | 1 | 0 | 0.000010 | 82 | 0 | 0 | 0.000000 | 30.00 |
| 179 | 48686 | 3 | 0 | 0.000031 | 81 | 0 | 0 | 0.000000 | 30.00 |
| 180 | 46760 | 1 | 0 | 0.000011 | 80 | 0 | 0 | 0.000000 | 30.00 |
| 181 | 49837 | 3 | 0 | 0.000030 | 82 | 0 | 0 | 0.000000 | 30.00 |
| 182 | 49869 | 2 | 0 | 0.000020 | 82 | 0 | 0 | 0.000000 | 30.00 |
| 183 | 49870 | 1 | 0 | 0.000010 | 82 | 0 | 0 | 0.000000 | 30.00 |
| 184 | 49870 | 1 | 0 | 0.000010 | 82 | 0 | 0 | 0.000000 | 30.00 |
| 185 | 49870 | 1 | 0 | 0.000010 | 82 | 0 | 0 | 0.000000 | 30.00 |
| 186 | 49869 | 2 | 0 | 0.000020 | 82 | 0 | 0 | 0.000000 | 30.00 |
| 187 | 49870 | 1 | 0 | 0.000010 | 82 | 0 | 0 | 0.000000 | 50.00 |
| 188 | 49869 | 1 | 1 | 0.000030 | 82 | 0 | 0 | 0.000000 | 49.99 |
| 189 | 49870 | 1 | 0 | 0.000010 | 82 | 0 | 0 | 0.000000 | 50.00 |
| 190 | 49870 | 1 | 0 | 0.000010 | 82 | 0 | 0 | 0.000000 | 50.00 |
| 191 | 49870 | 1 | 0 | 0.000010 | 82 | 0 | 0 | 0.000000 | 50.00 |
| 192 | 49868 | 2 | 1 | 0.000040 | 82 | 0 | 0 | 0.000000 | 49.99 |
| 193 | 49870 | 1 | 0 | 0.000010 | 82 | 0 | 0 | 0.000000 | 50.00 |
| 194 | 49869 | 2 | 0 | 0.000020 | 82 | 0 | 0 | 0.000000 | 50.00 |
| 195 | 49867 | 4 | 0 | 0.000040 | 82 | 0 | 0 | 0.000000 | 49.99 |
| 196 | 49870 | 1 | 0 | 0.000010 | 82 | 0 | 0 | 0.000000 | 50.00 |
| 197 | 49870 | 1 | 0 | 0.000010 | 82 | 0 | 0 | 0.000000 | 50.00 |
| 198 | 49868 | 3 | 0 | 0.000030 | 82 | 0 | 0 | 0.000000 | 49.99 |
| 199 | 49869 | 1 | 1 | 0.000030 | 82 | 0 | 0 | 0.000000 | 199.98 |
| 200 | 49870 | 1 | 0 | 0.000010 | 82 | 0 | 0 | 0.000000 | 50.00 |
| 201 | 49869 | 1 | 1 | 0.000030 | 82 | 0 | 0 | 0.000000 | 30.00 |
| 202 | 49869 | 2 | 0 | 0.000020 | 82 | 0 | 0 | 0.000000 | 30.00 |
| 203 | 49845 | 10 | 1 | 0.000120 | 82 | 0 | 0 | 0.000000 | 29.99 |
| 204 | 49850 | 2 | 0 | 0.000020 | 82 | 0 | 0 | 0.000000 | 30.00 |
| 205 | 49829 | 1 | 0 | 0.000010 | 82 | 0 | 0 | 0.000000 | 30.00 |
| 206 | 49756 | 33 | 0 | 0.000331 | 81 | 1 | 0 | 0.006098 | 29.96 |
| 207 | 49790 | 1 | 0 | 0.000010 | 82 | 0 | 0 | 0.000000 | 30.00 |
| 208 | 49636 | 112 | 11 | 0.001346 | 82 | 0 | 0 | 0.000000 | 29.86 |
| 209 | 49790 | 3 | 0 | 0.000030 | 82 | 0 | 0 | 0.000000 | 30.00 |
| 210 | 49147 | 1 | 0 | 0.000010 | 79 | 0 | 0 | 0.000000 | 30.00 |
| 211 | 49869 | 2 | 0 | 0.000020 | 82 | 0 | 0 | 0.000000 | 50.00 |
| 212 | 49870 | 1 | 0 | 0.000010 | 82 | 0 | 0 | 0.000000 | 50.00 |
| 213 | 49866 | 3 | 2 | 0.000070 | 82 | 0 | 0 | 0.000000 | 49.99 |
| 214 | 49870 | 1 | 0 | 0.000010 | 82 | 0 | 0 | 0.000000 | 50.00 |
| 215 | 49870 | 1 | 0 | 0.000010 | 82 | 0 | 0 | 0.000000 | 50.00 |
| 216 | 49868 | 2 | 1 | 0.000040 | 82 | 0 | 0 | 0.000000 | 49.99 |
| 217 | 49864 | 5 | 0 | 0.000050 | 82 | 0 | 0 | 0.000000 | 49.99 |
| 218 | 49778 | 4 | 0 | 0.000040 | 82 | 0 | 0 | 0.000000 | 49.99 |
| 219 | 49315 | 2 | 0 | 0.000020 | 82 | 0 | 0 | 0.000000 | 50.00 |
| 220 | 48569 | 2 | 0 | 0.000021 | 79 | 0 | 0 | 0.000000 | 50.00 |
| 221 | 49804 | 2 | 0 | 0.000020 | 82 | 0 | 0 | 0.000000 | 50.00 |
| 222 | 49819 | 1 | 0 | 0.000010 | 82 | 0 | 0 | 0.000000 | 50.00 |
| 223 | 49846 | 3 | 0 | 0.000030 | 82 | 0 | 0 | 0.000000 | 49.99 |
| 224 | 49856 | 1 | 0 | 0.000010 | 82 | 0 | 0 | 0.000000 | 50.00 |
| 225 | 49870 | 1 | 0 | 0.000010 | 82 | 0 | 0 | 0.000000 | 50.00 |
| 226 | 49867 | 4 | 0 | 0.000040 | 82 | 0 | 0 | 0.000000 | 49.99 |
| 227 | 49870 | 1 | 0 | 0.000010 | 82 | 0 | 0 | 0.000000 | 50.00 |
| 228 | 49866 | 5 | 0 | 0.000050 | 82 | 0 | 0 | 0.000000 | 49.99 |
| 229 | 49870 | 1 | 0 | 0.000010 | 82 | 0 | 0 | 0.000000 | 50.00 |
| 230 | 49868 | 2 | 0 | 0.000020 | 82 | 0 | 0 | 0.000000 | 30.00 |
| 231 | 49866 | 1 | 0 | 0.000010 | 82 | 0 | 0 | 0.000000 | 30.00 |
| 232 | 49860 | 2 | 0 | 0.000020 | 82 | 0 | 0 | 0.000000 | 30.00 |
| 233 | 49805 | 8 | 0 | 0.000080 | 82 | 0 | 0 | 0.000000 | 29.99 |
| 234 | 49711 | 1 | 0 | 0.000010 | 82 | 0 | 0 | 0.000000 | 30.00 |
| 235 | 49687 | 2 | 0 | 0.000020 | 82 | 0 | 0 | 0.000000 | 30.00 |
| 236 | 49758 | 3 | 0 | 0.000030 | 81 | 0 | 0 | 0.000000 | 30.00 |
| 237 | 46496 | 2267 | 1107 | 0.044927 | 81 | 0 | 1 | 0.012195 | 42.29 |
| 238 | 49854 | 13 | 4 | 0.000211 | 82 | 0 | 0 | 0.000000 | 49.96 |
| 239 | 49840 | 28 | 3 | 0.000341 | 82 | 0 | 0 | 0.000000 | 49.94 |
| 240 | 47858 | 1396 | 617 | 0.026368 | 81 | 0 | 1 | 0.012195 | 45.38 |
| 241 | 49861 | 6 | 4 | 0.000140 | 82 | 0 | 0 | 0.000000 | 49.97 |
| 242 | 49862 | 7 | 1 | 0.000090 | 82 | 0 | 0 | 0.000000 | 49.98 |
| 243 | 49870 | 1 | 0 | 0.000010 | 82 | 0 | 0 | 0.000000 | 50.00 |
| 244 | 49868 | 3 | 0 | 0.000030 | 82 | 0 | 0 | 0.000000 | 49.99 |
| 245 | 49733 | 5 | 0 | 0.000050 | 82 | 0 | 0 | 0.000000 | 29.99 |
| 246 | 48896 | 80 | 0 | 0.000817 | 78 | 0 | 0 | 0.000000 | 29.91 |
| 247 | 49562 | 22 | 1 | 0.000242 | 80 | 0 | 0 | 0.000000 | 29.97 |
| 248 | 49645 | 8 | 0 | 0.000081 | 80 | 0 | 0 | 0.000000 | 29.99 |
| 249 | 49834 | 2 | 0 | 0.000020 | 82 | 0 | 0 | 0.000000 | 30.00 |
| 250 | 49870 | 1 | 0 | 0.000010 | 82 | 0 | 0 | 0.000000 | 30.00 |
| 251 | 49869 | 2 | 0 | 0.000020 | 82 | 0 | 0 | 0.000000 | 30.00 |
| 252 | 49869 | 2 | 0 | 0.000020 | 82 | 0 | 0 | 0.000000 | 30.00 |
| 253 | 49869 | 2 | 0 | 0.000020 | 82 | 0 | 0 | 0.000000 | 30.00 |
| 254 | 49863 | 6 | 2 | 0.000100 | 82 | 0 | 0 | 0.000000 | 49.98 |
| 255 | 49866 | 4 | 1 | 0.000060 | 82 | 0 | 0 | 0.000000 | 49.99 |
| 256 | 49860 | 8 | 3 | 0.000140 | 82 | 0 | 0 | 0.000000 | 49.97 |
| 257 | 49710 | 114 | 47 | 0.002085 | 82 | 0 | 0 | 0.000000 | 49.63 |
| 258 | 49867 | 3 | 1 | 0.000050 | 82 | 0 | 0 | 0.000000 | 49.99 |
| 259 | 49870 | 1 | 0 | 0.000010 | 82 | 0 | 0 | 0.000000 | 50.00 |
| 260 | 49868 | 3 | 0 | 0.000030 | 82 | 0 | 0 | 0.000000 | 149.98 |
| 261 | 49870 | 1 | 0 | 0.000010 | 82 | 0 | 0 | 0.000000 | 50.00 |
| 262 | 49869 | 1 | 0 | 0.000010 | 82 | 0 | 0 | 0.000000 | 50.00 |
| 263 | 49671 | 1 | 0 | 0.000010 | 82 | 0 | 0 | 0.000000 | 30.00 |
| 264 | 49292 | 1 | 0 | 0.000010 | 81 | 0 | 0 | 0.000000 | 30.00 |
| 265 | 49790 | 1 | 0 | 0.000010 | 82 | 0 | 0 | 0.000000 | 30.00 |
| 266 | 49800 | 1 | 0 | 0.000010 | 82 | 0 | 0 | 0.000000 | 30.00 |
| 267 | 49864 | 1 | 0 | 0.000010 | 82 | 0 | 0 | 0.000000 | 30.00 |
| 268 | 49869 | 1 | 0 | 0.000010 | 82 | 0 | 0 | 0.000000 | 30.00 |
| 269 | 49865 | 5 | 0 | 0.000050 | 82 | 0 | 0 | 0.000000 | 29.99 |
| 270 | 49868 | 3 | 0 | 0.000030 | 82 | 0 | 0 | 0.000000 | 30.00 |
| 271 | 49869 | 1 | 1 | 0.000030 | 82 | 0 | 0 | 0.000000 | 30.00 |
| 272 | 49870 | 1 | 0 | 0.000010 | 82 | 0 | 0 | 0.000000 | 30.00 |
| 273 | 49870 | 1 | 0 | 0.000010 | 82 | 0 | 0 | 0.000000 | 50.00 |
| 274 | 49870 | 1 | 0 | 0.000010 | 82 | 0 | 0 | 0.000000 | 50.00 |
| 275 | 49869 | 1 | 1 | 0.000030 | 82 | 0 | 0 | 0.000000 | 49.99 |
| 276 | 49867 | 3 | 1 | 0.000050 | 81 | 0 | 1 | 0.012195 | 49.99 |
| 277 | 49870 | 1 | 0 | 0.000010 | 82 | 0 | 0 | 0.000000 | 30.00 |
| 278 | 49835 | 18 | 2 | 0.000221 | 82 | 0 | 0 | 0.000000 | 29.98 |
| 279 | 49844 | 1 | 0 | 0.000010 | 82 | 0 | 0 | 0.000000 | 30.00 |
| 280 | 49842 | 1 | 0 | 0.000010 | 82 | 0 | 0 | 0.000000 | 30.00 |
| 281 | 49806 | 2 | 0 | 0.000020 | 82 | 0 | 0 | 0.000000 | 30.00 |
| 282 | 49786 | 2 | 0 | 0.000020 | 82 | 0 | 0 | 0.000000 | 30.00 |
| 283 | 49784 | 4 | 0 | 0.000040 | 82 | 0 | 0 | 0.000000 | 30.00 |
| 284 | 49792 | 2 | 0 | 0.000020 | 82 | 0 | 0 | 0.000000 | 30.00 |
| 285 | 49795 | 1 | 0 | 0.000010 | 82 | 0 | 0 | 0.000000 | 30.00 |
| 286 | 49840 | 1 | 0 | 0.000010 | 82 | 0 | 0 | 0.000000 | 30.00 |
| 287 | 49845 | 3 | 0 | 0.000030 | 82 | 0 | 0 | 0.000000 | 30.00 |
| 288 | 49867 | 2 | 0 | 0.000020 | 82 | 0 | 0 | 0.000000 | 30.00 |
| 289 | 49864 | 6 | 1 | 0.000080 | 82 | 0 | 0 | 0.000000 | 29.99 |
| 290 | 49870 | 1 | 0 | 0.000010 | 82 | 0 | 0 | 0.000000 | 50.00 |
| 291 | 49835 | 1 | 0 | 0.000010 | 82 | 0 | 0 | 0.000000 | 100.00 |
| 292 | 49844 | 9 | 0 | 0.000090 | 82 | 0 | 0 | 0.000000 | 29.99 |
| 293 | 49718 | 7 | 1 | 0.000090 | 81 | 0 | 0 | 0.000000 | 29.99 |
| 294 | 48482 | 1 | 0 | 0.000010 | 76 | 0 | 0 | 0.000000 | 30.00 |
| 295 | 49358 | 45 | 0 | 0.000455 | 80 | 0 | 0 | 0.000000 | 29.95 |
| 296 | 49458 | 5 | 0 | 0.000051 | 80 | 0 | 0 | 0.000000 | 29.99 |
| 297 | 49770 | 8 | 0 | 0.000080 | 82 | 0 | 0 | 0.000000 | 29.99 |
| 298 | 49754 | 28 | 0 | 0.000281 | 82 | 0 | 0 | 0.000000 | 29.97 |
| 299 | 49593 | 204 | 49 | 0.003029 | 81 | 0 | 0 | 0.000000 | 29.67 |
| 300 | 49864 | 2 | 0 | 0.000020 | 82 | 0 | 0 | 0.000000 | 30.00 |
| 301 | 49863 | 6 | 0 | 0.000060 | 82 | 0 | 0 | 0.000000 | 29.99 |
| 302 | 0 | 1 | 49847 | 0.999990 | 0 | 0 | 82 | 1.000000 | 50.00 |
| 303 | 49847 | 1 | 0 | 0.000010 | 82 | 0 | 0 | 0.000000 | 50.00 |
| 304 | 49868 | 2 | 0 | 0.000020 | 82 | 0 | 0 | 0.000000 | 50.00 |
| 305 | 49868 | 3 | 0 | 0.000030 | 82 | 0 | 0 | 0.000000 | 49.99 |
| 306 | 49869 | 2 | 0 | 0.000020 | 82 | 0 | 0 | 0.000000 | 50.00 |
| 307 | 49868 | 2 | 1 | 0.000040 | 82 | 0 | 0 | 0.000000 | 49.99 |
| 308 | 49870 | 1 | 0 | 0.000010 | 82 | 0 | 0 | 0.000000 | 50.00 |
| 309 | 49869 | 2 | 0 | 0.000020 | 82 | 0 | 0 | 0.000000 | 50.00 |
| 310 | 49828 | 26 | 15 | 0.000561 | 82 | 0 | 0 | 0.000000 | 49.90 |
| 311 | 49856 | 11 | 3 | 0.000170 | 82 | 0 | 0 | 0.000000 | 29.98 |
| 312 | 49860 | 3 | 0 | 0.000030 | 82 | 0 | 0 | 0.000000 | 30.00 |
| 313 | 49850 | 1 | 0 | 0.000010 | 82 | 0 | 0 | 0.000000 | 30.00 |
| 314 | 49780 | 1 | 0 | 0.000010 | 81 | 0 | 0 | 0.000000 | 30.00 |
| 315 | 49598 | 112 | 15 | 0.001428 | 80 | 0 | 0 | 0.000000 | 29.85 |
| 316 | 49561 | 29 | 1 | 0.000313 | 79 | 1 | 0 | 0.006250 | 29.97 |
| 317 | 49671 | 7 | 0 | 0.000070 | 82 | 0 | 0 | 0.000000 | 29.99 |
| 318 | 49786 | 2 | 0 | 0.000020 | 82 | 0 | 0 | 0.000000 | 30.00 |
| 319 | 49792 | 2 | 1 | 0.000040 | 82 | 0 | 0 | 0.000000 | 30.00 |
| 320 | 49870 | 1 | 0 | 0.000010 | 82 | 0 | 0 | 0.000000 | 50.00 |
| 321 | 49868 | 2 | 0 | 0.000020 | 82 | 0 | 0 | 0.000000 | 50.00 |
| 322 | 49869 | 2 | 0 | 0.000020 | 82 | 0 | 0 | 0.000000 | 50.00 |
| 323 | 49849 | 8 | 4 | 0.000160 | 82 | 0 | 0 | 0.000000 | 29.98 |
| 324 | 49855 | 5 | 1 | 0.000070 | 82 | 0 | 0 | 0.000000 | 29.99 |
| 325 | 49855 | 5 | 0 | 0.000050 | 82 | 0 | 0 | 0.000000 | 29.99 |
| 326 | 49850 | 6 | 0 | 0.000060 | 82 | 0 | 0 | 0.000000 | 29.99 |
| 327 | 49842 | 6 | 0 | 0.000060 | 81 | 0 | 0 | 0.000000 | 29.99 |
| 328 | 49661 | 1 | 0 | 0.000010 | 81 | 0 | 0 | 0.000000 | 30.00 |
| 329 | 49597 | 1 | 0 | 0.000010 | 81 | 0 | 0 | 0.000000 | 30.00 |
| 330 | 49299 | 8 | 0 | 0.000081 | 79 | 0 | 0 | 0.000000 | 29.99 |
| 331 | 49287 | 2 | 0 | 0.000020 | 79 | 0 | 0 | 0.000000 | 30.00 |
| 332 | 48293 | 1 | 0 | 0.000010 | 77 | 0 | 0 | 0.000000 | 30.00 |
| 333 | 49607 | 7 | 1 | 0.000091 | 81 | 0 | 0 | 0.000000 | 29.99 |
| 334 | 49818 | 3 | 0 | 0.000030 | 81 | 0 | 0 | 0.000000 | 30.00 |
| 335 | 49866 | 1 | 0 | 0.000010 | 82 | 0 | 0 | 0.000000 | 50.00 |
| 336 | 49862 | 8 | 0 | 0.000080 | 82 | 0 | 0 | 0.000000 | 49.99 |
| 337 | 49869 | 1 | 0 | 0.000010 | 82 | 0 | 0 | 0.000000 | 50.00 |
| 338 | 49864 | 4 | 1 | 0.000060 | 82 | 0 | 0 | 0.000000 | 49.99 |
| 339 | 49833 | 3 | 0 | 0.000030 | 82 | 0 | 0 | 0.000000 | 49.99 |
| 340 | 49831 | 1 | 0 | 0.000010 | 82 | 0 | 0 | 0.000000 | 50.00 |
| 341 | 49543 | 1 | 0 | 0.000010 | 81 | 0 | 0 | 0.000000 | 30.00 |
| 342 | 48556 | 8 | 0 | 0.000082 | 80 | 0 | 0 | 0.000000 | 29.99 |
| 343 | 48174 | 1 | 0 | 0.000010 | 79 | 0 | 0 | 0.000000 | 30.00 |
| 344 | 47877 | 1 | 0 | 0.000010 | 79 | 0 | 0 | 0.000000 | 30.00 |
| 345 | 47280 | 134 | 0 | 0.001413 | 79 | 0 | 0 | 0.000000 | 29.85 |
| 346 | 47218 | 5 | 0 | 0.000053 | 78 | 0 | 0 | 0.000000 | 29.99 |
| 347 | 0 | 1 | 47218 | 0.999989 | 0 | 0 | 78 | 1.000000 | 30.00 |
| 348 | 0 | 10 | 47830 | 0.999896 | 0 | 0 | 81 | 1.000000 | 29.99 |
| 349 | 47830 | 4 | 0 | 0.000042 | 81 | 0 | 0 | 0.000000 | 30.00 |
| 350 | 49548 | 1 | 0 | 0.000010 | 81 | 0 | 0 | 0.000000 | 30.00 |
| 351 | 49655 | 2 | 0 | 0.000020 | 82 | 0 | 0 | 0.000000 | 30.00 |
| 352 | 49734 | 1 | 0 | 0.000010 | 82 | 0 | 0 | 0.000000 | 30.00 |
| 353 | 49809 | 1 | 0 | 0.000010 | 82 | 0 | 0 | 0.000000 | 30.00 |
| 354 | 49833 | 1 | 0 | 0.000010 | 82 | 0 | 0 | 0.000000 | 30.00 |
| 355 | 49856 | 1 | 0 | 0.000010 | 82 | 0 | 0 | 0.000000 | 30.00 |
| 356 | 49870 | 1 | 0 | 0.000010 | 82 | 0 | 0 | 0.000000 | 50.00 |
| 357 | 49865 | 4 | 1 | 0.000060 | 82 | 0 | 0 | 0.000000 | 49.99 |
| 358 | 49869 | 2 | 0 | 0.000020 | 82 | 0 | 0 | 0.000000 | 50.00 |
| 359 | 49870 | 1 | 0 | 0.000010 | 82 | 0 | 0 | 0.000000 | 50.00 |
| 360 | 49868 | 3 | 0 | 0.000030 | 82 | 0 | 0 | 0.000000 | 49.99 |
| 361 | 49867 | 4 | 0 | 0.000040 | 82 | 0 | 0 | 0.000000 | 49.99 |
| 362 | 49870 | 1 | 0 | 0.000010 | 82 | 0 | 0 | 0.000000 | 50.00 |
| 363 | 49864 | 2 | 0 | 0.000020 | 82 | 0 | 0 | 0.000000 | 50.00 |
| 364 | 49840 | 1 | 0 | 0.000010 | 82 | 0 | 0 | 0.000000 | 30.00 |
| 365 | 49836 | 1 | 0 | 0.000010 | 82 | 0 | 0 | 0.000000 | 30.00 |
| 366 | 49752 | 5 | 0 | 0.000050 | 82 | 0 | 0 | 0.000000 | 29.99 |
| 367 | 49743 | 4 | 0 | 0.000040 | 82 | 0 | 0 | 0.000000 | 30.00 |
| 368 | 49671 | 1 | 0 | 0.000010 | 81 | 0 | 0 | 0.000000 | 30.00 |
| 369 | 49598 | 1 | 0 | 0.000010 | 81 | 0 | 0 | 0.000000 | 30.00 |
| 370 | 49396 | 39 | 0 | 0.000394 | 82 | 0 | 0 | 0.000000 | 29.96 |
| 371 | 49690 | 1 | 0 | 0.000010 | 82 | 0 | 0 | 0.000000 | 30.00 |
| 372 | 49865 | 4 | 0 | 0.000040 | 82 | 0 | 0 | 0.000000 | 49.99 |
| 373 | 49869 | 2 | 0 | 0.000020 | 82 | 0 | 0 | 0.000000 | 50.00 |
| 374 | 49869 | 2 | 0 | 0.000020 | 82 | 0 | 0 | 0.000000 | 50.00 |
| 375 | 49870 | 1 | 0 | 0.000010 | 82 | 0 | 0 | 0.000000 | 50.00 |
| 376 | 49867 | 4 | 0 | 0.000040 | 82 | 0 | 0 | 0.000000 | 49.99 |
| 377 | 49870 | 1 | 0 | 0.000010 | 82 | 0 | 0 | 0.000000 | 50.00 |
| 378 | 49869 | 1 | 0 | 0.000010 | 82 | 0 | 0 | 0.000000 | 50.00 |
| 379 | 49852 | 11 | 6 | 0.000231 | 82 | 0 | 0 | 0.000000 | 49.96 |
| 380 | 49863 | 1 | 0 | 0.000010 | 82 | 0 | 0 | 0.000000 | 50.00 |
| 381 | 49809 | 1 | 0 | 0.000010 | 82 | 0 | 0 | 0.000000 | 30.00 |
| 382 | 48487 | 1 | 0 | 0.000010 | 79 | 0 | 0 | 0.000000 | 30.00 |
| 383 | 48419 | 2 | 0 | 0.000021 | 77 | 0 | 0 | 0.000000 | 30.00 |
| 384 | 49867 | 1 | 0 | 0.000010 | 82 | 0 | 0 | 0.000000 | 30.00 |
| 385 | 49867 | 4 | 0 | 0.000040 | 82 | 0 | 0 | 0.000000 | 49.99 |
| 386 | 49869 | 2 | 0 | 0.000020 | 82 | 0 | 0 | 0.000000 | 50.00 |
| 387 | 49850 | 15 | 5 | 0.000251 | 82 | 0 | 0 | 0.000000 | 49.95 |
| 388 | 49862 | 7 | 2 | 0.000110 | 82 | 0 | 0 | 0.000000 | 49.98 |
| 389 | 49867 | 4 | 0 | 0.000040 | 82 | 0 | 0 | 0.000000 | 49.99 |
| 390 | 49870 | 1 | 0 | 0.000010 | 82 | 0 | 0 | 0.000000 | 50.00 |
| 391 | 49867 | 1 | 0 | 0.000010 | 82 | 0 | 0 | 0.000000 | 50.00 |
| 392 | 49865 | 2 | 0 | 0.000020 | 82 | 0 | 0 | 0.000000 | 30.00 |
| 393 | 49300 | 11 | 0 | 0.000112 | 81 | 0 | 0 | 0.000000 | 29.99 |
| 394 | 49279 | 5 | 0 | 0.000051 | 81 | 0 | 0 | 0.000000 | 29.99 |
| 395 | 49231 | 12 | 0 | 0.000122 | 81 | 0 | 0 | 0.000000 | 29.99 |
| 396 | 49039 | 7 | 1 | 0.000092 | 80 | 0 | 0 | 0.000000 | 29.99 |
| 397 | 49046 | 1 | 0 | 0.000010 | 80 | 0 | 0 | 0.000000 | 30.00 |
| 398 | 49015 | 2 | 0 | 0.000020 | 80 | 0 | 0 | 0.000000 | 30.00 |
| 399 | 49686 | 2 | 0 | 0.000020 | 81 | 0 | 0 | 0.000000 | 30.00 |
| 400 | 48874 | 582 | 74 | 0.007369 | 80 | 1 | 0 | 0.006173 | 29.21 |
| 401 | 49698 | 1 | 0 | 0.000010 | 81 | 0 | 0 | 0.000000 | 30.00 |
| 402 | 49753 | 2 | 0 | 0.000020 | 82 | 0 | 0 | 0.000000 | 30.00 |
| 403 | 49869 | 2 | 0 | 0.000020 | 82 | 0 | 0 | 0.000000 | 50.00 |
| 404 | 49870 | 1 | 0 | 0.000010 | 82 | 0 | 0 | 0.000000 | 50.00 |
| 405 | 49870 | 1 | 0 | 0.000010 | 82 | 0 | 0 | 0.000000 | 50.00 |
| 406 | 49867 | 4 | 0 | 0.000040 | 82 | 0 | 0 | 0.000000 | 49.99 |
| 407 | 49861 | 8 | 1 | 0.000100 | 82 | 0 | 0 | 0.000000 | 49.98 |
| 408 | 49870 | 1 | 0 | 0.000010 | 82 | 0 | 0 | 0.000000 | 50.00 |
| 409 | 49850 | 1 | 0 | 0.000010 | 82 | 0 | 0 | 0.000000 | 30.00 |
| 410 | 49826 | 1 | 1 | 0.000030 | 82 | 0 | 0 | 0.000000 | 30.00 |
| 411 | 49822 | 1 | 0 | 0.000010 | 82 | 0 | 0 | 0.000000 | 30.00 |
| 412 | 49822 | 1 | 0 | 0.000010 | 82 | 0 | 0 | 0.000000 | 30.00 |
| 413 | 49815 | 1 | 0 | 0.000010 | 82 | 0 | 0 | 0.000000 | 30.00 |
| 414 | 49634 | 1 | 0 | 0.000010 | 82 | 0 | 0 | 0.000000 | 30.00 |
| 415 | 49597 | 1 | 0 | 0.000010 | 82 | 0 | 0 | 0.000000 | 30.00 |
| 416 | 49206 | 11 | 0 | 0.000112 | 82 | 0 | 0 | 0.000000 | 29.99 |
| 417 | 49517 | 2 | 0 | 0.000020 | 82 | 0 | 0 | 0.000000 | 30.00 |
| 418 | 49572 | 6 | 0 | 0.000061 | 82 | 0 | 0 | 0.000000 | 29.99 |
| 419 | 49863 | 2 | 0 | 0.000020 | 82 | 0 | 0 | 0.000000 | 30.00 |
| 420 | 49449 | 289 | 117 | 0.005245 | 79 | 1 | 2 | 0.030488 | 29.43 |
| 421 | 49845 | 20 | 2 | 0.000241 | 82 | 0 | 0 | 0.000000 | 29.97 |
| 422 | 49860 | 9 | 1 | 0.000110 | 82 | 0 | 0 | 0.000000 | 29.99 |
| 423 | 49870 | 1 | 0 | 0.000010 | 82 | 0 | 0 | 0.000000 | 50.00 |
| 424 | 49839 | 22 | 9 | 0.000401 | 82 | 0 | 0 | 0.000000 | 49.93 |
| 425 | 49870 | 1 | 0 | 0.000010 | 82 | 0 | 0 | 0.000000 | 199.99 |
| 426 | 49870 | 1 | 0 | 0.000010 | 82 | 0 | 0 | 0.000000 | 50.00 |
| 427 | 49578 | 2 | 0 | 0.000020 | 82 | 0 | 0 | 0.000000 | 30.00 |
| 428 | 49598 | 1 | 0 | 0.000010 | 82 | 0 | 0 | 0.000000 | 30.00 |
| 429 | 49853 | 4 | 2 | 0.000080 | 82 | 0 | 0 | 0.000000 | 29.99 |
| 430 | 49868 | 1 | 0 | 0.000010 | 82 | 0 | 0 | 0.000000 | 30.00 |
| 431 | 49865 | 4 | 1 | 0.000060 | 82 | 0 | 0 | 0.000000 | 49.99 |
| 432 | 49869 | 1 | 1 | 0.000030 | 82 | 0 | 0 | 0.000000 | 49.99 |
| 433 | 49870 | 1 | 0 | 0.000010 | 82 | 0 | 0 | 0.000000 | 50.00 |
| 434 | 49865 | 6 | 0 | 0.000060 | 82 | 0 | 0 | 0.000000 | 49.99 |
| 435 | 49787 | 63 | 21 | 0.001053 | 82 | 0 | 0 | 0.000000 | 49.81 |
| 436 | 49869 | 1 | 1 | 0.000030 | 82 | 0 | 0 | 0.000000 | 49.99 |
| 437 | 49638 | 167 | 66 | 0.002998 | 82 | 0 | 0 | 0.000000 | 49.46 |
| 438 | 49869 | 2 | 0 | 0.000020 | 82 | 0 | 0 | 0.000000 | 50.00 |
| 439 | 49791 | 54 | 26 | 0.001063 | 82 | 0 | 0 | 0.000000 | 49.81 |
| 440 | 49864 | 3 | 1 | 0.000050 | 82 | 0 | 0 | 0.000000 | 199.96 |
| 441 | 49864 | 3 | 0 | 0.000030 | 82 | 0 | 0 | 0.000000 | 49.99 |
| 442 | 49849 | 18 | 1 | 0.000201 | 82 | 0 | 0 | 0.000000 | 29.98 |
| 443 | 49426 | 443 | 0 | 0.004442 | 80 | 2 | 0 | 0.012195 | 29.52 |
| 444 | 49866 | 1 | 0 | 0.000010 | 82 | 0 | 0 | 0.000000 | 30.00 |
| 445 | 49851 | 1 | 0 | 0.000010 | 82 | 0 | 0 | 0.000000 | 30.00 |
| 446 | 49801 | 1 | 0 | 0.000010 | 82 | 0 | 0 | 0.000000 | 30.00 |
| 447 | 49729 | 1 | 0 | 0.000010 | 82 | 0 | 0 | 0.000000 | 30.00 |
| 448 | 49729 | 1 | 0 | 0.000010 | 82 | 0 | 0 | 0.000000 | 30.00 |
| 449 | 49826 | 21 | 5 | 0.000311 | 82 | 0 | 0 | 0.000000 | 29.97 |
| 450 | 49864 | 5 | 0 | 0.000050 | 82 | 0 | 0 | 0.000000 | 29.99 |
| 451 | 49870 | 1 | 0 | 0.000010 | 82 | 0 | 0 | 0.000000 | 50.00 |
| 452 | 49870 | 1 | 0 | 0.000010 | 82 | 0 | 0 | 0.000000 | 50.00 |
| 453 | 49868 | 3 | 0 | 0.000030 | 82 | 0 | 0 | 0.000000 | 49.99 |
| 454 | 49865 | 4 | 1 | 0.000060 | 82 | 0 | 0 | 0.000000 | 49.99 |
| 455 | 49870 | 1 | 0 | 0.000010 | 82 | 0 | 0 | 0.000000 | 50.00 |
| 456 | 49870 | 1 | 0 | 0.000010 | 82 | 0 | 0 | 0.000000 | 50.00 |
| 457 | 49849 | 5 | 0 | 0.000050 | 82 | 0 | 0 | 0.000000 | 29.99 |
| 458 | 49740 | 21 | 0 | 0.000211 | 82 | 0 | 0 | 0.000000 | 29.98 |
| 459 | 49700 | 6 | 0 | 0.000060 | 82 | 0 | 0 | 0.000000 | 29.99 |
| 460 | 49696 | 6 | 0 | 0.000060 | 82 | 0 | 0 | 0.000000 | 29.99 |
| 461 | 49697 | 6 | 0 | 0.000060 | 82 | 0 | 0 | 0.000000 | 29.99 |
| 462 | 49685 | 6 | 0 | 0.000060 | 82 | 0 | 0 | 0.000000 | 29.99 |
| 463 | 49688 | 4 | 0 | 0.000040 | 82 | 0 | 0 | 0.000000 | 30.00 |
| 464 | 49714 | 1 | 0 | 0.000010 | 82 | 0 | 0 | 0.000000 | 30.00 |
| 465 | 49379 | 7 | 0 | 0.000071 | 82 | 0 | 0 | 0.000000 | 29.99 |
| 466 | 49791 | 1 | 0 | 0.000010 | 82 | 0 | 0 | 0.000000 | 30.00 |
| 467 | 49823 | 2 | 0 | 0.000020 | 82 | 0 | 0 | 0.000000 | 30.00 |
| 468 | 49582 | 190 | 58 | 0.003070 | 81 | 0 | 0 | 0.000000 | 29.67 |
| 469 | 35361 | 8646 | 5856 | 0.204139 | 64 | 11 | 7 | 0.152439 | 20.77 |
| 470 | 49870 | 1 | 0 | 0.000010 | 82 | 0 | 0 | 0.000000 | 50.00 |
| 471 | 49864 | 1 | 0 | 0.000010 | 82 | 0 | 0 | 0.000000 | 30.00 |
| 472 | 49793 | 6 | 0 | 0.000060 | 82 | 0 | 0 | 0.000000 | 29.99 |
| 473 | 49753 | 2 | 0 | 0.000020 | 82 | 0 | 0 | 0.000000 | 30.00 |
| 474 | 49414 | 188 | 17 | 0.002237 | 81 | 0 | 0 | 0.000000 | 29.76 |
| 475 | 49500 | 3 | 0 | 0.000030 | 82 | 0 | 0 | 0.000000 | 30.00 |
| 476 | 49832 | 1 | 1 | 0.000030 | 82 | 0 | 0 | 0.000000 | 30.00 |
| 477 | 49831 | 10 | 0 | 0.000100 | 82 | 0 | 0 | 0.000000 | 29.99 |
| 478 | 49865 | 6 | 0 | 0.000060 | 82 | 0 | 0 | 0.000000 | 29.99 |
| 479 | 49868 | 3 | 0 | 0.000030 | 82 | 0 | 0 | 0.000000 | 49.99 |
| 480 | 49831 | 34 | 5 | 0.000441 | 82 | 0 | 0 | 0.000000 | 49.92 |
| 481 | 49869 | 2 | 0 | 0.000020 | 82 | 0 | 0 | 0.000000 | 50.00 |
| 482 | 49869 | 2 | 0 | 0.000020 | 82 | 0 | 0 | 0.000000 | 50.00 |
| 483 | 49870 | 1 | 0 | 0.000010 | 82 | 0 | 0 | 0.000000 | 50.00 |
| 484 | 49867 | 2 | 1 | 0.000040 | 82 | 0 | 0 | 0.000000 | 49.99 |
| 485 | 49869 | 1 | 0 | 0.000010 | 82 | 0 | 0 | 0.000000 | 50.00 |
| 486 | 49867 | 1 | 0 | 0.000010 | 82 | 0 | 0 | 0.000000 | 30.00 |
| 487 | 49842 | 3 | 0 | 0.000030 | 82 | 0 | 0 | 0.000000 | 30.00 |
| 488 | 49514 | 1 | 0 | 0.000010 | 81 | 0 | 0 | 0.000000 | 30.00 |
| 489 | 49381 | 2 | 0 | 0.000020 | 79 | 0 | 0 | 0.000000 | 30.00 |
| 490 | 0 | 26 | 49016 | 0.999735 | 0 | 0 | 80 | 1.000000 | 29.97 |
| 491 | 49333 | 15 | 0 | 0.000152 | 82 | 0 | 0 | 0.000000 | 29.98 |
| 492 | 49411 | 1 | 0 | 0.000010 | 82 | 0 | 0 | 0.000000 | 30.00 |
| 493 | 49514 | 1 | 0 | 0.000010 | 81 | 0 | 0 | 0.000000 | 30.00 |
| 494 | 49639 | 2 | 0 | 0.000020 | 81 | 0 | 0 | 0.000000 | 30.00 |
| 495 | 49646 | 2 | 0 | 0.000020 | 81 | 0 | 0 | 0.000000 | 30.00 |
| 496 | 49849 | 1 | 0 | 0.000010 | 82 | 0 | 0 | 0.000000 | 30.00 |
| 497 | 49866 | 4 | 1 | 0.000060 | 82 | 0 | 0 | 0.000000 | 49.99 |
| 498 | 49870 | 1 | 0 | 0.000010 | 82 | 0 | 0 | 0.000000 | 50.00 |
| 499 | 49870 | 1 | 0 | 0.000010 | 82 | 0 | 0 | 0.000000 | 50.00 |
| 500 | 49870 | 1 | 0 | 0.000010 | 82 | 0 | 0 | 0.000000 | 50.00 |
| 501 | 49869 | 2 | 0 | 0.000020 | 82 | 0 | 0 | 0.000000 | 50.00 |
| 502 | 49850 | 17 | 3 | 0.000231 | 82 | 0 | 0 | 0.000000 | 49.96 |
| 503 | 49333 | 377 | 155 | 0.006889 | 81 | 0 | 1 | 0.012195 | 48.77 |
| 504 | 49870 | 1 | 0 | 0.000010 | 82 | 0 | 0 | 0.000000 | 50.00 |
| 505 | 49865 | 3 | 1 | 0.000050 | 82 | 0 | 0 | 0.000000 | 49.99 |
| 506 | 49866 | 4 | 1 | 0.000060 | 82 | 0 | 0 | 0.000000 | 49.99 |
| 507 | 49867 | 2 | 1 | 0.000040 | 82 | 0 | 0 | 0.000000 | 49.99 |
| 508 | 49867 | 3 | 0 | 0.000030 | 82 | 0 | 0 | 0.000000 | 49.99 |
| 509 | 49843 | 23 | 3 | 0.000291 | 82 | 0 | 0 | 0.000000 | 49.95 |
| 510 | 49824 | 2 | 0 | 0.000020 | 82 | 0 | 0 | 0.000000 | 50.00 |

**Supplementary Table 1B**

Genotype counts and frequencies for variants in *TMPRSS2*.

| Locus | contAA | contAB | contBB | contFreq | caseAA | caseAB | caseBB | caseFreq | weight |
| --- | --- | --- | --- | --- | --- | --- | --- | --- | --- |
| 1 | 49858 | 1 | 0 | 0.000010 | 82 | 0 | 0 | 0.000000 | 50.00 |
| 2 | 49862 | 1 | 0 | 0.000010 | 82 | 0 | 0 | 0.000000 | 50.00 |
| 3 | 49858 | 7 | 0 | 0.000070 | 82 | 0 | 0 | 0.000000 | 49.99 |
| 4 | 49866 | 2 | 0 | 0.000020 | 82 | 0 | 0 | 0.000000 | 50.00 |
| 5 | 49861 | 10 | 0 | 0.000100 | 82 | 0 | 0 | 0.000000 | 49.98 |
| 6 | 49860 | 11 | 0 | 0.000110 | 82 | 0 | 0 | 0.000000 | 49.98 |
| 7 | 49869 | 2 | 0 | 0.000020 | 82 | 0 | 0 | 0.000000 | 50.00 |
| 8 | 49869 | 2 | 0 | 0.000020 | 82 | 0 | 0 | 0.000000 | 50.00 |
| 9 | 49869 | 2 | 0 | 0.000020 | 82 | 0 | 0 | 0.000000 | 50.00 |
| 10 | 49868 | 3 | 0 | 0.000030 | 82 | 0 | 0 | 0.000000 | 49.99 |
| 11 | 49870 | 1 | 0 | 0.000010 | 82 | 0 | 0 | 0.000000 | 50.00 |
| 12 | 49869 | 2 | 0 | 0.000020 | 82 | 0 | 0 | 0.000000 | 50.00 |
| 13 | 49870 | 1 | 0 | 0.000010 | 82 | 0 | 0 | 0.000000 | 50.00 |
| 14 | 49869 | 2 | 0 | 0.000020 | 82 | 0 | 0 | 0.000000 | 50.00 |
| 15 | 49870 | 1 | 0 | 0.000010 | 82 | 0 | 0 | 0.000000 | 50.00 |
| 16 | 49868 | 3 | 0 | 0.000030 | 82 | 0 | 0 | 0.000000 | 49.99 |
| 17 | 49870 | 1 | 0 | 0.000010 | 82 | 0 | 0 | 0.000000 | 50.00 |
| 18 | 49866 | 5 | 0 | 0.000050 | 82 | 0 | 0 | 0.000000 | 49.99 |
| 19 | 49848 | 23 | 0 | 0.000231 | 82 | 0 | 0 | 0.000000 | 49.96 |
| 20 | 49869 | 2 | 0 | 0.000020 | 82 | 0 | 0 | 0.000000 | 50.00 |
| 21 | 49860 | 11 | 0 | 0.000110 | 82 | 0 | 0 | 0.000000 | 49.98 |
| 22 | 49870 | 1 | 0 | 0.000010 | 82 | 0 | 0 | 0.000000 | 50.00 |
| 23 | 49868 | 3 | 0 | 0.000030 | 82 | 0 | 0 | 0.000000 | 30.00 |
| 24 | 49870 | 1 | 0 | 0.000010 | 82 | 0 | 0 | 0.000000 | 30.00 |
| 25 | 49870 | 1 | 0 | 0.000010 | 82 | 0 | 0 | 0.000000 | 30.00 |
| 26 | 0 | 24 | 45786 | 0.999738 | 0 | 0 | 78 | 1.000000 | 29.97 |
| 27 | 49870 | 1 | 0 | 0.000010 | 82 | 0 | 0 | 0.000000 | 30.00 |
| 28 | 49851 | 20 | 0 | 0.000201 | 82 | 0 | 0 | 0.000000 | 29.98 |
| 29 | 49807 | 62 | 2 | 0.000662 | 82 | 0 | 0 | 0.000000 | 29.93 |
| 30 | 49869 | 2 | 0 | 0.000020 | 82 | 0 | 0 | 0.000000 | 30.00 |
| 31 | 49870 | 1 | 0 | 0.000010 | 82 | 0 | 0 | 0.000000 | 30.00 |
| 32 | 49868 | 3 | 0 | 0.000030 | 82 | 0 | 0 | 0.000000 | 30.00 |
| 33 | 49870 | 1 | 0 | 0.000010 | 82 | 0 | 0 | 0.000000 | 30.00 |
| 34 | 49867 | 3 | 0 | 0.000030 | 82 | 0 | 0 | 0.000000 | 30.00 |
| 35 | 49866 | 4 | 0 | 0.000040 | 82 | 0 | 0 | 0.000000 | 30.00 |
| 36 | 38022 | 11035 | 812 | 0.126923 | 68 | 14 | 0 | 0.085366 | 18.04 |
| 37 | 49834 | 8 | 0 | 0.000080 | 82 | 0 | 0 | 0.000000 | 29.99 |
| 38 | 49822 | 1 | 0 | 0.000010 | 82 | 0 | 0 | 0.000000 | 30.00 |
| 39 | 49808 | 8 | 0 | 0.000080 | 82 | 0 | 0 | 0.000000 | 29.99 |
| 40 | 49753 | 1 | 0 | 0.000010 | 82 | 0 | 0 | 0.000000 | 30.00 |
| 41 | 49870 | 1 | 0 | 0.000010 | 82 | 0 | 0 | 0.000000 | 30.00 |
| 42 | 49869 | 2 | 0 | 0.000020 | 82 | 0 | 0 | 0.000000 | 30.00 |
| 43 | 49866 | 5 | 0 | 0.000050 | 82 | 0 | 0 | 0.000000 | 29.99 |
| 44 | 49673 | 198 | 0 | 0.001985 | 82 | 0 | 0 | 0.000000 | 29.79 |
| 45 | 49869 | 2 | 0 | 0.000020 | 82 | 0 | 0 | 0.000000 | 30.00 |
| 46 | 49870 | 1 | 0 | 0.000010 | 82 | 0 | 0 | 0.000000 | 30.00 |
| 47 | 49870 | 1 | 0 | 0.000010 | 82 | 0 | 0 | 0.000000 | 30.00 |
| 48 | 49870 | 1 | 0 | 0.000010 | 82 | 0 | 0 | 0.000000 | 30.00 |
| 49 | 49771 | 100 | 0 | 0.001003 | 82 | 0 | 0 | 0.000000 | 29.89 |
| 50 | 49869 | 2 | 0 | 0.000020 | 82 | 0 | 0 | 0.000000 | 30.00 |
| 51 | 49870 | 1 | 0 | 0.000010 | 82 | 0 | 0 | 0.000000 | 30.00 |
| 52 | 49870 | 1 | 0 | 0.000010 | 82 | 0 | 0 | 0.000000 | 50.00 |
| 53 | 49156 | 713 | 2 | 0.007189 | 82 | 0 | 0 | 0.000000 | 48.72 |
| 54 | 49869 | 2 | 0 | 0.000020 | 82 | 0 | 0 | 0.000000 | 50.00 |
| 55 | 49869 | 2 | 0 | 0.000020 | 82 | 0 | 0 | 0.000000 | 50.00 |
| 56 | 49869 | 2 | 0 | 0.000020 | 82 | 0 | 0 | 0.000000 | 50.00 |
| 57 | 49868 | 3 | 0 | 0.000030 | 82 | 0 | 0 | 0.000000 | 49.99 |
| 58 | 49870 | 1 | 0 | 0.000010 | 82 | 0 | 0 | 0.000000 | 50.00 |
| 59 | 49867 | 4 | 0 | 0.000040 | 82 | 0 | 0 | 0.000000 | 49.99 |
| 60 | 49870 | 1 | 0 | 0.000010 | 82 | 0 | 0 | 0.000000 | 50.00 |
| 61 | 49859 | 12 | 0 | 0.000120 | 82 | 0 | 0 | 0.000000 | 49.98 |
| 62 | 49864 | 7 | 0 | 0.000070 | 82 | 0 | 0 | 0.000000 | 49.99 |
| 63 | 49870 | 1 | 0 | 0.000010 | 82 | 0 | 0 | 0.000000 | 50.00 |
| 64 | 49870 | 1 | 0 | 0.000010 | 82 | 0 | 0 | 0.000000 | 30.00 |
| 65 | 49870 | 1 | 0 | 0.000010 | 82 | 0 | 0 | 0.000000 | 30.00 |
| 66 | 49477 | 391 | 3 | 0.003980 | 82 | 0 | 0 | 0.000000 | 29.57 |
| 67 | 49870 | 1 | 0 | 0.000010 | 82 | 0 | 0 | 0.000000 | 30.00 |
| 68 | 49605 | 265 | 1 | 0.002677 | 82 | 0 | 0 | 0.000000 | 29.71 |
| 69 | 49870 | 1 | 0 | 0.000010 | 82 | 0 | 0 | 0.000000 | 30.00 |
| 70 | 49845 | 25 | 0 | 0.000251 | 82 | 0 | 0 | 0.000000 | 29.97 |
| 71 | 49867 | 2 | 0 | 0.000020 | 82 | 0 | 0 | 0.000000 | 30.00 |
| 72 | 49837 | 2 | 0 | 0.000020 | 82 | 0 | 0 | 0.000000 | 30.00 |
| 73 | 49837 | 8 | 0 | 0.000080 | 82 | 0 | 0 | 0.000000 | 29.99 |
| 74 | 49837 | 1 | 0 | 0.000010 | 82 | 0 | 0 | 0.000000 | 30.00 |
| 75 | 49864 | 2 | 0 | 0.000020 | 82 | 0 | 0 | 0.000000 | 30.00 |
| 76 | 49864 | 1 | 0 | 0.000010 | 82 | 0 | 0 | 0.000000 | 30.00 |
| 77 | 49856 | 13 | 0 | 0.000130 | 82 | 0 | 0 | 0.000000 | 29.99 |
| 78 | 49870 | 1 | 0 | 0.000010 | 82 | 0 | 0 | 0.000000 | 30.00 |
| 79 | 49870 | 1 | 0 | 0.000010 | 82 | 0 | 0 | 0.000000 | 30.00 |
| 80 | 49869 | 2 | 0 | 0.000020 | 82 | 0 | 0 | 0.000000 | 30.00 |
| 81 | 49862 | 9 | 0 | 0.000090 | 82 | 0 | 0 | 0.000000 | 29.99 |
| 82 | 49870 | 1 | 0 | 0.000010 | 82 | 0 | 0 | 0.000000 | 30.00 |
| 83 | 49870 | 1 | 0 | 0.000010 | 82 | 0 | 0 | 0.000000 | 30.00 |
| 84 | 49870 | 1 | 0 | 0.000010 | 82 | 0 | 0 | 0.000000 | 30.00 |
| 85 | 49870 | 1 | 0 | 0.000010 | 82 | 0 | 0 | 0.000000 | 30.00 |
| 86 | 49870 | 1 | 0 | 0.000010 | 82 | 0 | 0 | 0.000000 | 30.00 |
| 87 | 49866 | 5 | 0 | 0.000050 | 82 | 0 | 0 | 0.000000 | 29.99 |
| 88 | 49870 | 1 | 0 | 0.000010 | 82 | 0 | 0 | 0.000000 | 30.00 |
| 89 | 49870 | 1 | 0 | 0.000010 | 82 | 0 | 0 | 0.000000 | 199.99 |
| 90 | 49869 | 2 | 0 | 0.000020 | 82 | 0 | 0 | 0.000000 | 50.00 |
| 91 | 49868 | 3 | 0 | 0.000030 | 82 | 0 | 0 | 0.000000 | 49.99 |
| 92 | 49870 | 1 | 0 | 0.000010 | 82 | 0 | 0 | 0.000000 | 50.00 |
| 93 | 49870 | 1 | 0 | 0.000010 | 82 | 0 | 0 | 0.000000 | 50.00 |
| 94 | 49868 | 3 | 0 | 0.000030 | 82 | 0 | 0 | 0.000000 | 49.99 |
| 95 | 49869 | 2 | 0 | 0.000020 | 82 | 0 | 0 | 0.000000 | 50.00 |
| 96 | 49870 | 1 | 0 | 0.000010 | 82 | 0 | 0 | 0.000000 | 50.00 |
| 97 | 49710 | 160 | 1 | 0.001624 | 82 | 0 | 0 | 0.000000 | 49.71 |
| 98 | 49870 | 1 | 0 | 0.000010 | 82 | 0 | 0 | 0.000000 | 50.00 |
| 99 | 49870 | 1 | 0 | 0.000010 | 82 | 0 | 0 | 0.000000 | 50.00 |
| 100 | 49870 | 1 | 0 | 0.000010 | 82 | 0 | 0 | 0.000000 | 50.00 |
| 101 | 49870 | 1 | 0 | 0.000010 | 82 | 0 | 0 | 0.000000 | 50.00 |
| 102 | 49870 | 1 | 0 | 0.000010 | 82 | 0 | 0 | 0.000000 | 50.00 |
| 103 | 49870 | 1 | 0 | 0.000010 | 82 | 0 | 0 | 0.000000 | 50.00 |
| 104 | 49870 | 1 | 0 | 0.000010 | 82 | 0 | 0 | 0.000000 | 50.00 |
| 105 | 49870 | 1 | 0 | 0.000010 | 82 | 0 | 0 | 0.000000 | 50.00 |
| 106 | 49870 | 1 | 0 | 0.000010 | 82 | 0 | 0 | 0.000000 | 50.00 |
| 107 | 49870 | 1 | 0 | 0.000010 | 82 | 0 | 0 | 0.000000 | 50.00 |
| 108 | 49870 | 1 | 0 | 0.000010 | 82 | 0 | 0 | 0.000000 | 50.00 |
| 109 | 49869 | 2 | 0 | 0.000020 | 82 | 0 | 0 | 0.000000 | 50.00 |
| 110 | 49870 | 1 | 0 | 0.000010 | 82 | 0 | 0 | 0.000000 | 50.00 |
| 111 | 49869 | 2 | 0 | 0.000020 | 82 | 0 | 0 | 0.000000 | 50.00 |
| 112 | 49870 | 1 | 0 | 0.000010 | 82 | 0 | 0 | 0.000000 | 30.00 |
| 113 | 49870 | 1 | 0 | 0.000010 | 82 | 0 | 0 | 0.000000 | 30.00 |
| 114 | 49849 | 22 | 0 | 0.000221 | 81 | 1 | 0 | 0.006098 | 29.98 |
| 115 | 49870 | 1 | 0 | 0.000010 | 82 | 0 | 0 | 0.000000 | 30.00 |
| 116 | 49870 | 1 | 0 | 0.000010 | 82 | 0 | 0 | 0.000000 | 30.00 |
| 117 | 49864 | 7 | 0 | 0.000070 | 82 | 0 | 0 | 0.000000 | 29.99 |
| 118 | 49870 | 1 | 0 | 0.000010 | 82 | 0 | 0 | 0.000000 | 30.00 |
| 119 | 49870 | 1 | 0 | 0.000010 | 82 | 0 | 0 | 0.000000 | 30.00 |
| 120 | 49870 | 1 | 0 | 0.000010 | 82 | 0 | 0 | 0.000000 | 30.00 |
| 121 | 49870 | 1 | 0 | 0.000010 | 82 | 0 | 0 | 0.000000 | 30.00 |
| 122 | 49870 | 1 | 0 | 0.000010 | 82 | 0 | 0 | 0.000000 | 30.00 |
| 123 | 49870 | 1 | 0 | 0.000010 | 82 | 0 | 0 | 0.000000 | 30.00 |
| 124 | 49835 | 1 | 0 | 0.000010 | 82 | 0 | 0 | 0.000000 | 30.00 |
| 125 | 49867 | 1 | 0 | 0.000010 | 82 | 0 | 0 | 0.000000 | 30.00 |
| 126 | 49864 | 4 | 0 | 0.000040 | 82 | 0 | 0 | 0.000000 | 30.00 |
| 127 | 49774 | 94 | 3 | 0.001003 | 81 | 1 | 0 | 0.006098 | 29.89 |
| 128 | 49870 | 1 | 0 | 0.000010 | 82 | 0 | 0 | 0.000000 | 30.00 |
| 129 | 49867 | 4 | 0 | 0.000040 | 82 | 0 | 0 | 0.000000 | 30.00 |
| 130 | 49869 | 2 | 0 | 0.000020 | 82 | 0 | 0 | 0.000000 | 30.00 |
| 131 | 49870 | 1 | 0 | 0.000010 | 82 | 0 | 0 | 0.000000 | 50.00 |
| 132 | 49865 | 6 | 0 | 0.000060 | 82 | 0 | 0 | 0.000000 | 49.99 |
| 133 | 47040 | 2782 | 49 | 0.028874 | 80 | 2 | 0 | 0.012195 | 44.96 |
| 134 | 49869 | 1 | 0 | 0.000010 | 82 | 0 | 0 | 0.000000 | 299.99 |
| 135 | 49870 | 1 | 0 | 0.000010 | 82 | 0 | 0 | 0.000000 | 50.00 |
| 136 | 49864 | 7 | 0 | 0.000070 | 82 | 0 | 0 | 0.000000 | 49.99 |
| 137 | 49869 | 2 | 0 | 0.000020 | 82 | 0 | 0 | 0.000000 | 50.00 |
| 138 | 49870 | 1 | 0 | 0.000010 | 82 | 0 | 0 | 0.000000 | 50.00 |
| 139 | 49864 | 7 | 0 | 0.000070 | 82 | 0 | 0 | 0.000000 | 49.99 |
| 140 | 49868 | 3 | 0 | 0.000030 | 82 | 0 | 0 | 0.000000 | 49.99 |
| 141 | 49860 | 2 | 0 | 0.000020 | 82 | 0 | 0 | 0.000000 | 50.00 |
| 142 | 49870 | 1 | 0 | 0.000010 | 82 | 0 | 0 | 0.000000 | 50.00 |
| 143 | 49870 | 1 | 0 | 0.000010 | 82 | 0 | 0 | 0.000000 | 50.00 |
| 144 | 49870 | 1 | 0 | 0.000010 | 82 | 0 | 0 | 0.000000 | 199.99 |
| 145 | 49869 | 2 | 0 | 0.000020 | 82 | 0 | 0 | 0.000000 | 50.00 |
| 146 | 49870 | 1 | 0 | 0.000010 | 82 | 0 | 0 | 0.000000 | 50.00 |
| 147 | 49870 | 1 | 0 | 0.000010 | 82 | 0 | 0 | 0.000000 | 30.00 |
| 148 | 49870 | 1 | 0 | 0.000010 | 82 | 0 | 0 | 0.000000 | 30.00 |
| 149 | 49847 | 24 | 0 | 0.000241 | 82 | 0 | 0 | 0.000000 | 29.97 |
| 150 | 49834 | 37 | 0 | 0.000371 | 82 | 0 | 0 | 0.000000 | 29.96 |
| 151 | 49870 | 1 | 0 | 0.000010 | 82 | 0 | 0 | 0.000000 | 30.00 |
| 152 | 49815 | 20 | 0 | 0.000201 | 81 | 1 | 0 | 0.006098 | 29.98 |
| 153 | 49866 | 5 | 0 | 0.000050 | 82 | 0 | 0 | 0.000000 | 29.99 |
| 154 | 49867 | 1 | 0 | 0.000010 | 82 | 0 | 0 | 0.000000 | 30.00 |
| 155 | 49868 | 1 | 0 | 0.000010 | 82 | 0 | 0 | 0.000000 | 30.00 |
| 156 | 49824 | 9 | 0 | 0.000090 | 82 | 0 | 0 | 0.000000 | 29.99 |
| 157 | 49813 | 2 | 0 | 0.000020 | 82 | 0 | 0 | 0.000000 | 30.00 |
| 158 | 49747 | 20 | 0 | 0.000201 | 82 | 0 | 0 | 0.000000 | 29.98 |
| 159 | 49867 | 2 | 0 | 0.000020 | 82 | 0 | 0 | 0.000000 | 30.00 |
| 160 | 49867 | 2 | 0 | 0.000020 | 82 | 0 | 0 | 0.000000 | 30.00 |
| 161 | 49868 | 1 | 0 | 0.000010 | 82 | 0 | 0 | 0.000000 | 30.00 |
| 162 | 49861 | 8 | 1 | 0.000100 | 82 | 0 | 0 | 0.000000 | 29.99 |
| 163 | 49870 | 1 | 0 | 0.000010 | 82 | 0 | 0 | 0.000000 | 30.00 |
| 164 | 49865 | 6 | 0 | 0.000060 | 82 | 0 | 0 | 0.000000 | 29.99 |
| 165 | 49870 | 1 | 0 | 0.000010 | 82 | 0 | 0 | 0.000000 | 30.00 |
| 166 | 49868 | 3 | 0 | 0.000030 | 82 | 0 | 0 | 0.000000 | 30.00 |
| 167 | 49866 | 5 | 0 | 0.000050 | 82 | 0 | 0 | 0.000000 | 29.99 |
| 168 | 49870 | 1 | 0 | 0.000010 | 82 | 0 | 0 | 0.000000 | 50.00 |
| 169 | 49870 | 1 | 0 | 0.000010 | 82 | 0 | 0 | 0.000000 | 50.00 |
| 170 | 49869 | 2 | 0 | 0.000020 | 82 | 0 | 0 | 0.000000 | 50.00 |
| 171 | 49868 | 3 | 0 | 0.000030 | 82 | 0 | 0 | 0.000000 | 49.99 |
| 172 | 49868 | 3 | 0 | 0.000030 | 82 | 0 | 0 | 0.000000 | 49.99 |
| 173 | 49870 | 1 | 0 | 0.000010 | 82 | 0 | 0 | 0.000000 | 50.00 |
| 174 | 49870 | 1 | 0 | 0.000010 | 82 | 0 | 0 | 0.000000 | 50.00 |
| 175 | 49868 | 3 | 0 | 0.000030 | 82 | 0 | 0 | 0.000000 | 49.99 |
| 176 | 49870 | 1 | 0 | 0.000010 | 82 | 0 | 0 | 0.000000 | 50.00 |
| 177 | 49870 | 1 | 0 | 0.000010 | 82 | 0 | 0 | 0.000000 | 50.00 |
| 178 | 49870 | 1 | 0 | 0.000010 | 82 | 0 | 0 | 0.000000 | 50.00 |
| 179 | 49870 | 1 | 0 | 0.000010 | 82 | 0 | 0 | 0.000000 | 50.00 |
| 180 | 49870 | 1 | 0 | 0.000010 | 82 | 0 | 0 | 0.000000 | 50.00 |
| 181 | 49870 | 1 | 0 | 0.000010 | 82 | 0 | 0 | 0.000000 | 50.00 |
| 182 | 49870 | 1 | 0 | 0.000010 | 82 | 0 | 0 | 0.000000 | 50.00 |
| 183 | 49870 | 1 | 0 | 0.000010 | 82 | 0 | 0 | 0.000000 | 50.00 |
| 184 | 49852 | 19 | 0 | 0.000190 | 82 | 0 | 0 | 0.000000 | 49.97 |
| 185 | 49869 | 2 | 0 | 0.000020 | 82 | 0 | 0 | 0.000000 | 50.00 |
| 186 | 49869 | 2 | 0 | 0.000020 | 82 | 0 | 0 | 0.000000 | 50.00 |
| 187 | 49869 | 2 | 0 | 0.000020 | 82 | 0 | 0 | 0.000000 | 50.00 |
| 188 | 49853 | 7 | 0 | 0.000070 | 82 | 0 | 0 | 0.000000 | 99.97 |
| 189 | 49865 | 6 | 0 | 0.000060 | 82 | 0 | 0 | 0.000000 | 49.99 |
| 190 | 49870 | 1 | 0 | 0.000010 | 82 | 0 | 0 | 0.000000 | 50.00 |
| 191 | 49868 | 1 | 0 | 0.000010 | 82 | 0 | 0 | 0.000000 | 50.00 |
| 192 | 49870 | 1 | 0 | 0.000010 | 82 | 0 | 0 | 0.000000 | 50.00 |
| 193 | 49867 | 4 | 0 | 0.000040 | 82 | 0 | 0 | 0.000000 | 49.99 |
| 194 | 49862 | 9 | 0 | 0.000090 | 82 | 0 | 0 | 0.000000 | 49.98 |
| 195 | 49869 | 2 | 0 | 0.000020 | 82 | 0 | 0 | 0.000000 | 50.00 |
| 196 | 49870 | 1 | 0 | 0.000010 | 82 | 0 | 0 | 0.000000 | 50.00 |
| 197 | 49869 | 2 | 0 | 0.000020 | 82 | 0 | 0 | 0.000000 | 50.00 |
| 198 | 49870 | 1 | 0 | 0.000010 | 82 | 0 | 0 | 0.000000 | 30.00 |
| 199 | 49870 | 1 | 0 | 0.000010 | 82 | 0 | 0 | 0.000000 | 30.00 |
| 200 | 49741 | 130 | 0 | 0.001303 | 82 | 0 | 0 | 0.000000 | 29.86 |
| 201 | 49835 | 36 | 0 | 0.000361 | 82 | 0 | 0 | 0.000000 | 29.96 |
| 202 | 49862 | 9 | 0 | 0.000090 | 82 | 0 | 0 | 0.000000 | 29.99 |
| 203 | 49870 | 1 | 0 | 0.000010 | 82 | 0 | 0 | 0.000000 | 30.00 |
| 204 | 48466 | 1336 | 64 | 0.014679 | 78 | 4 | 0 | 0.024390 | 28.44 |
| 205 | 16264 | 24051 | 9556 | 0.432746 | 29 | 36 | 17 | 0.426829 | 3.49 |
| 206 | 49869 | 1 | 0 | 0.000010 | 82 | 0 | 0 | 0.000000 | 30.00 |
| 207 | 49865 | 4 | 0 | 0.000040 | 82 | 0 | 0 | 0.000000 | 30.00 |
| 208 | 49865 | 2 | 0 | 0.000020 | 82 | 0 | 0 | 0.000000 | 30.00 |
| 209 | 49866 | 1 | 0 | 0.000010 | 82 | 0 | 0 | 0.000000 | 30.00 |
| 210 | 49867 | 2 | 0 | 0.000020 | 82 | 0 | 0 | 0.000000 | 30.00 |
| 211 | 49866 | 3 | 0 | 0.000030 | 82 | 0 | 0 | 0.000000 | 30.00 |
| 212 | 49818 | 6 | 0 | 0.000060 | 82 | 0 | 0 | 0.000000 | 29.99 |
| 213 | 46368 | 3430 | 69 | 0.035775 | 76 | 6 | 0 | 0.036585 | 26.27 |
| 214 | 49870 | 1 | 0 | 0.000010 | 82 | 0 | 0 | 0.000000 | 30.00 |
| 215 | 49870 | 1 | 0 | 0.000010 | 82 | 0 | 0 | 0.000000 | 30.00 |
| 216 | 49870 | 1 | 0 | 0.000010 | 82 | 0 | 0 | 0.000000 | 30.00 |
| 217 | 49870 | 1 | 0 | 0.000010 | 82 | 0 | 0 | 0.000000 | 30.00 |
| 218 | 49852 | 19 | 0 | 0.000190 | 82 | 0 | 0 | 0.000000 | 29.98 |
| 219 | 49436 | 421 | 14 | 0.004502 | 79 | 3 | 0 | 0.018293 | 29.51 |
| 220 | 49419 | 437 | 15 | 0.004682 | 79 | 3 | 0 | 0.018293 | 29.49 |
| 221 | 48369 | 1484 | 18 | 0.015239 | 81 | 1 | 0 | 0.006098 | 28.38 |
| 222 | 49864 | 7 | 0 | 0.000070 | 82 | 0 | 0 | 0.000000 | 29.99 |
| 223 | 49864 | 1 | 0 | 0.000010 | 82 | 0 | 0 | 0.000000 | 30.00 |
| 224 | 49868 | 3 | 0 | 0.000030 | 82 | 0 | 0 | 0.000000 | 30.00 |
| 225 | 49870 | 1 | 0 | 0.000010 | 82 | 0 | 0 | 0.000000 | 30.00 |
| 226 | 49857 | 14 | 0 | 0.000140 | 82 | 0 | 0 | 0.000000 | 29.98 |
| 227 | 49838 | 33 | 0 | 0.000331 | 82 | 0 | 0 | 0.000000 | 29.96 |
| 228 | 49870 | 1 | 0 | 0.000010 | 82 | 0 | 0 | 0.000000 | 30.00 |
| 229 | 49870 | 1 | 0 | 0.000010 | 82 | 0 | 0 | 0.000000 | 30.00 |
| 230 | 49870 | 1 | 0 | 0.000010 | 82 | 0 | 0 | 0.000000 | 50.00 |
| 231 | 49856 | 15 | 0 | 0.000150 | 82 | 0 | 0 | 0.000000 | 49.97 |
| 232 | 49867 | 4 | 0 | 0.000040 | 82 | 0 | 0 | 0.000000 | 49.99 |
| 233 | 49863 | 8 | 0 | 0.000080 | 82 | 0 | 0 | 0.000000 | 49.99 |
| 234 | 49870 | 1 | 0 | 0.000010 | 82 | 0 | 0 | 0.000000 | 50.00 |
| 235 | 49870 | 1 | 0 | 0.000010 | 82 | 0 | 0 | 0.000000 | 50.00 |
| 236 | 49870 | 1 | 0 | 0.000010 | 82 | 0 | 0 | 0.000000 | 50.00 |
| 237 | 49870 | 1 | 0 | 0.000010 | 82 | 0 | 0 | 0.000000 | 50.00 |
| 238 | 49870 | 1 | 0 | 0.000010 | 82 | 0 | 0 | 0.000000 | 50.00 |
| 239 | 49870 | 1 | 0 | 0.000010 | 82 | 0 | 0 | 0.000000 | 50.00 |
| 240 | 49863 | 8 | 0 | 0.000080 | 82 | 0 | 0 | 0.000000 | 49.99 |
| 241 | 49870 | 1 | 0 | 0.000010 | 82 | 0 | 0 | 0.000000 | 50.00 |
| 242 | 49870 | 1 | 0 | 0.000010 | 82 | 0 | 0 | 0.000000 | 50.00 |
| 243 | 49866 | 5 | 0 | 0.000050 | 82 | 0 | 0 | 0.000000 | 49.99 |
| 244 | 49869 | 2 | 0 | 0.000020 | 82 | 0 | 0 | 0.000000 | 50.00 |
| 245 | 49870 | 1 | 0 | 0.000010 | 82 | 0 | 0 | 0.000000 | 50.00 |
| 246 | 49870 | 1 | 0 | 0.000010 | 82 | 0 | 0 | 0.000000 | 50.00 |
| 247 | 49865 | 6 | 0 | 0.000060 | 82 | 0 | 0 | 0.000000 | 49.99 |
| 248 | 49867 | 4 | 0 | 0.000040 | 82 | 0 | 0 | 0.000000 | 49.99 |
| 249 | 49862 | 9 | 0 | 0.000090 | 82 | 0 | 0 | 0.000000 | 49.98 |
| 250 | 49869 | 2 | 0 | 0.000020 | 82 | 0 | 0 | 0.000000 | 50.00 |
| 251 | 49852 | 2 | 0 | 0.000020 | 82 | 0 | 0 | 0.000000 | 99.99 |
| 252 | 49870 | 1 | 0 | 0.000010 | 82 | 0 | 0 | 0.000000 | 50.00 |
| 253 | 49870 | 1 | 0 | 0.000010 | 82 | 0 | 0 | 0.000000 | 50.00 |
| 254 | 49869 | 2 | 0 | 0.000020 | 82 | 0 | 0 | 0.000000 | 50.00 |
| 255 | 49870 | 1 | 0 | 0.000010 | 82 | 0 | 0 | 0.000000 | 50.00 |
| 256 | 49862 | 9 | 0 | 0.000090 | 82 | 0 | 0 | 0.000000 | 49.98 |
| 257 | 49869 | 2 | 0 | 0.000020 | 82 | 0 | 0 | 0.000000 | 50.00 |
| 258 | 49854 | 17 | 0 | 0.000170 | 82 | 0 | 0 | 0.000000 | 49.97 |
| 259 | 49869 | 2 | 0 | 0.000020 | 82 | 0 | 0 | 0.000000 | 50.00 |
| 260 | 49859 | 12 | 0 | 0.000120 | 82 | 0 | 0 | 0.000000 | 49.98 |
| 261 | 49868 | 1 | 0 | 0.000010 | 82 | 0 | 0 | 0.000000 | 50.00 |
| 262 | 49861 | 10 | 0 | 0.000100 | 82 | 0 | 0 | 0.000000 | 49.98 |
| 263 | 29802 | 17439 | 2630 | 0.227577 | 56 | 25 | 1 | 0.164634 | 18.37 |
| 264 | 49859 | 1 | 0 | 0.000010 | 82 | 0 | 0 | 0.000000 | 299.99 |
| 265 | 49870 | 1 | 0 | 0.000010 | 82 | 0 | 0 | 0.000000 | 50.00 |
| 266 | 14704 | 24540 | 10627 | 0.459125 | 27 | 39 | 16 | 0.432927 | 5.30 |
| 267 | 49870 | 1 | 0 | 0.000010 | 82 | 0 | 0 | 0.000000 | 50.00 |
| 268 | 49870 | 1 | 0 | 0.000010 | 82 | 0 | 0 | 0.000000 | 50.00 |
| 269 | 49870 | 1 | 0 | 0.000010 | 82 | 0 | 0 | 0.000000 | 50.00 |
| 270 | 49870 | 1 | 0 | 0.000010 | 82 | 0 | 0 | 0.000000 | 50.00 |
| 271 | 49870 | 1 | 0 | 0.000010 | 82 | 0 | 0 | 0.000000 | 30.00 |
| 272 | 49867 | 4 | 0 | 0.000040 | 82 | 0 | 0 | 0.000000 | 30.00 |
| 273 | 49870 | 1 | 0 | 0.000010 | 82 | 0 | 0 | 0.000000 | 30.00 |
| 274 | 49864 | 7 | 0 | 0.000070 | 82 | 0 | 0 | 0.000000 | 29.99 |
| 275 | 49870 | 1 | 0 | 0.000010 | 82 | 0 | 0 | 0.000000 | 30.00 |
| 276 | 49870 | 1 | 0 | 0.000010 | 82 | 0 | 0 | 0.000000 | 30.00 |
| 277 | 49815 | 56 | 0 | 0.000561 | 82 | 0 | 0 | 0.000000 | 29.94 |
| 278 | 49870 | 1 | 0 | 0.000010 | 82 | 0 | 0 | 0.000000 | 30.00 |
| 279 | 49868 | 1 | 0 | 0.000010 | 82 | 0 | 0 | 0.000000 | 30.00 |
| 280 | 49862 | 7 | 0 | 0.000070 | 82 | 0 | 0 | 0.000000 | 29.99 |
| 281 | 49866 | 3 | 0 | 0.000030 | 82 | 0 | 0 | 0.000000 | 30.00 |
| 282 | 49863 | 6 | 0 | 0.000060 | 82 | 0 | 0 | 0.000000 | 29.99 |
| 283 | 49854 | 1 | 0 | 0.000010 | 82 | 0 | 0 | 0.000000 | 30.00 |
| 284 | 49848 | 3 | 0 | 0.000030 | 82 | 0 | 0 | 0.000000 | 30.00 |
| 285 | 49838 | 14 | 0 | 0.000140 | 82 | 0 | 0 | 0.000000 | 29.98 |
| 286 | 49828 | 4 | 0 | 0.000040 | 82 | 0 | 0 | 0.000000 | 30.00 |
| 287 | 49853 | 1 | 0 | 0.000010 | 82 | 0 | 0 | 0.000000 | 30.00 |
| 288 | 49854 | 1 | 0 | 0.000010 | 82 | 0 | 0 | 0.000000 | 30.00 |
| 289 | 49858 | 1 | 0 | 0.000010 | 82 | 0 | 0 | 0.000000 | 30.00 |
| 290 | 49870 | 1 | 0 | 0.000010 | 82 | 0 | 0 | 0.000000 | 30.00 |
| 291 | 49870 | 1 | 0 | 0.000010 | 82 | 0 | 0 | 0.000000 | 30.00 |
| 292 | 49301 | 564 | 4 | 0.005735 | 82 | 0 | 0 | 0.000000 | 29.39 |
| 293 | 49870 | 1 | 0 | 0.000010 | 82 | 0 | 0 | 0.000000 | 30.00 |
| 294 | 49868 | 3 | 0 | 0.000030 | 82 | 0 | 0 | 0.000000 | 30.00 |
| 295 | 49856 | 15 | 0 | 0.000150 | 80 | 2 | 0 | 0.012195 | 29.98 |
| 296 | 49870 | 1 | 0 | 0.000010 | 82 | 0 | 0 | 0.000000 | 50.00 |
| 297 | 49870 | 1 | 0 | 0.000010 | 82 | 0 | 0 | 0.000000 | 199.99 |
| 298 | 49869 | 2 | 0 | 0.000020 | 82 | 0 | 0 | 0.000000 | 50.00 |
| 299 | 49870 | 1 | 0 | 0.000010 | 82 | 0 | 0 | 0.000000 | 50.00 |
| 300 | 49870 | 1 | 0 | 0.000010 | 82 | 0 | 0 | 0.000000 | 50.00 |
| 301 | 49870 | 1 | 0 | 0.000010 | 82 | 0 | 0 | 0.000000 | 50.00 |
| 302 | 47633 | 2019 | 139 | 0.023066 | 73 | 8 | 1 | 0.060976 | 27.56 |
| 303 | 49870 | 1 | 0 | 0.000010 | 82 | 0 | 0 | 0.000000 | 30.00 |
| 304 | 49867 | 3 | 0 | 0.000030 | 82 | 0 | 0 | 0.000000 | 30.00 |
| 305 | 47109 | 2715 | 46 | 0.028143 | 77 | 5 | 0 | 0.030488 | 27.05 |
| 306 | 49868 | 1 | 0 | 0.000010 | 82 | 0 | 0 | 0.000000 | 30.00 |
| 307 | 49861 | 1 | 0 | 0.000010 | 82 | 0 | 0 | 0.000000 | 30.00 |
| 308 | 49830 | 27 | 0 | 0.000271 | 82 | 0 | 0 | 0.000000 | 29.97 |
| 309 | 49799 | 1 | 0 | 0.000010 | 82 | 0 | 0 | 0.000000 | 30.00 |
| 310 | 49700 | 46 | 0 | 0.000462 | 82 | 0 | 0 | 0.000000 | 29.95 |
| 311 | 49624 | 1 | 0 | 0.000010 | 82 | 0 | 0 | 0.000000 | 30.00 |
| 312 | 49545 | 2 | 0 | 0.000020 | 82 | 0 | 0 | 0.000000 | 30.00 |
| 313 | 29181 | 16536 | 3847 | 0.244431 | 44 | 28 | 9 | 0.283951 | 10.05 |
| 314 | 49834 | 2 | 0 | 0.000020 | 82 | 0 | 0 | 0.000000 | 30.00 |
| 315 | 49849 | 1 | 0 | 0.000010 | 82 | 0 | 0 | 0.000000 | 30.00 |
| 316 | 49855 | 1 | 0 | 0.000010 | 82 | 0 | 0 | 0.000000 | 30.00 |
| 317 | 49868 | 2 | 0 | 0.000020 | 82 | 0 | 0 | 0.000000 | 30.00 |
| 318 | 49868 | 3 | 0 | 0.000030 | 82 | 0 | 0 | 0.000000 | 49.99 |
| 319 | 49869 | 1 | 0 | 0.000010 | 82 | 0 | 0 | 0.000000 | 299.99 |
| 320 | 49869 | 2 | 0 | 0.000020 | 82 | 0 | 0 | 0.000000 | 50.00 |
| 321 | 49869 | 2 | 0 | 0.000020 | 82 | 0 | 0 | 0.000000 | 50.00 |
| 322 | 49630 | 241 | 0 | 0.002416 | 81 | 1 | 0 | 0.006098 | 49.57 |
| 323 | 49849 | 22 | 0 | 0.000221 | 82 | 0 | 0 | 0.000000 | 49.96 |
| 324 | 49868 | 3 | 0 | 0.000030 | 82 | 0 | 0 | 0.000000 | 49.99 |
| 325 | 49869 | 1 | 0 | 0.000010 | 82 | 0 | 0 | 0.000000 | 50.00 |
| 326 | 49870 | 1 | 0 | 0.000010 | 82 | 0 | 0 | 0.000000 | 50.00 |
| 327 | 49870 | 1 | 0 | 0.000010 | 82 | 0 | 0 | 0.000000 | 50.00 |
| 328 | 49870 | 1 | 0 | 0.000010 | 82 | 0 | 0 | 0.000000 | 50.00 |
| 329 | 49868 | 3 | 0 | 0.000030 | 82 | 0 | 0 | 0.000000 | 199.98 |
| 330 | 49870 | 1 | 0 | 0.000010 | 82 | 0 | 0 | 0.000000 | 30.00 |
| 331 | 49869 | 1 | 0 | 0.000010 | 82 | 0 | 0 | 0.000000 | 30.00 |
| 332 | 49867 | 1 | 0 | 0.000010 | 82 | 0 | 0 | 0.000000 | 30.00 |
| 333 | 49866 | 1 | 0 | 0.000010 | 82 | 0 | 0 | 0.000000 | 30.00 |
| 334 | 49839 | 24 | 0 | 0.000241 | 82 | 0 | 0 | 0.000000 | 29.97 |
| 335 | 49797 | 57 | 0 | 0.000572 | 82 | 0 | 0 | 0.000000 | 29.94 |
| 336 | 49823 | 1 | 0 | 0.000010 | 82 | 0 | 0 | 0.000000 | 30.00 |
| 337 | 49824 | 1 | 0 | 0.000010 | 82 | 0 | 0 | 0.000000 | 30.00 |
| 338 | 49817 | 5 | 0 | 0.000050 | 82 | 0 | 0 | 0.000000 | 29.99 |
| 339 | 49811 | 6 | 0 | 0.000060 | 82 | 0 | 0 | 0.000000 | 29.99 |
| 340 | 49816 | 1 | 0 | 0.000010 | 82 | 0 | 0 | 0.000000 | 30.00 |
| 341 | 49801 | 6 | 0 | 0.000060 | 82 | 0 | 0 | 0.000000 | 29.99 |
| 342 | 49808 | 1 | 0 | 0.000010 | 82 | 0 | 0 | 0.000000 | 30.00 |
| 343 | 49870 | 1 | 0 | 0.000010 | 82 | 0 | 0 | 0.000000 | 30.00 |
| 344 | 49870 | 1 | 0 | 0.000010 | 82 | 0 | 0 | 0.000000 | 30.00 |
| 345 | 44988 | 4767 | 116 | 0.050119 | 77 | 5 | 0 | 0.030488 | 24.86 |
| 346 | 49858 | 13 | 0 | 0.000130 | 82 | 0 | 0 | 0.000000 | 29.99 |
| 347 | 49861 | 10 | 0 | 0.000100 | 82 | 0 | 0 | 0.000000 | 29.99 |
| 348 | 13588 | 24518 | 11765 | 0.481723 | 25 | 35 | 22 | 0.481707 | 3.04 |
| 349 | 49867 | 4 | 0 | 0.000040 | 82 | 0 | 0 | 0.000000 | 30.00 |
| 350 | 49750 | 120 | 1 | 0.001223 | 82 | 0 | 0 | 0.000000 | 29.87 |
| 351 | 49870 | 1 | 0 | 0.000010 | 82 | 0 | 0 | 0.000000 | 30.00 |
| 352 | 49851 | 20 | 0 | 0.000201 | 82 | 0 | 0 | 0.000000 | 29.98 |
| 353 | 49870 | 1 | 0 | 0.000010 | 82 | 0 | 0 | 0.000000 | 30.00 |
| 354 | 49865 | 6 | 0 | 0.000060 | 82 | 0 | 0 | 0.000000 | 49.99 |
| 355 | 49870 | 1 | 0 | 0.000010 | 82 | 0 | 0 | 0.000000 | 199.99 |
| 356 | 49870 | 1 | 0 | 0.000010 | 82 | 0 | 0 | 0.000000 | 50.00 |
| 357 | 49870 | 1 | 0 | 0.000010 | 82 | 0 | 0 | 0.000000 | 50.00 |
| 358 | 49870 | 1 | 0 | 0.000010 | 82 | 0 | 0 | 0.000000 | 50.00 |
| 359 | 49870 | 1 | 0 | 0.000010 | 82 | 0 | 0 | 0.000000 | 50.00 |
| 360 | 49870 | 1 | 0 | 0.000010 | 82 | 0 | 0 | 0.000000 | 50.00 |
| 361 | 49869 | 2 | 0 | 0.000020 | 82 | 0 | 0 | 0.000000 | 50.00 |
| 362 | 48429 | 1436 | 6 | 0.014517 | 81 | 1 | 0 | 0.006098 | 47.43 |
| 363 | 49870 | 1 | 0 | 0.000010 | 82 | 0 | 0 | 0.000000 | 50.00 |
| 364 | 49868 | 3 | 0 | 0.000030 | 82 | 0 | 0 | 0.000000 | 49.99 |
| 365 | 49869 | 2 | 0 | 0.000020 | 82 | 0 | 0 | 0.000000 | 50.00 |
| 366 | 49870 | 1 | 0 | 0.000010 | 82 | 0 | 0 | 0.000000 | 50.00 |
| 367 | 49859 | 6 | 0 | 0.000060 | 82 | 0 | 0 | 0.000000 | 199.96 |
| 368 | 49870 | 1 | 0 | 0.000010 | 82 | 0 | 0 | 0.000000 | 50.00 |
| 369 | 49867 | 4 | 0 | 0.000040 | 82 | 0 | 0 | 0.000000 | 49.99 |
| 370 | 49870 | 1 | 0 | 0.000010 | 82 | 0 | 0 | 0.000000 | 50.00 |
| 371 | 49870 | 1 | 0 | 0.000010 | 82 | 0 | 0 | 0.000000 | 50.00 |
| 372 | 49870 | 1 | 0 | 0.000010 | 82 | 0 | 0 | 0.000000 | 50.00 |
| 373 | 49869 | 2 | 0 | 0.000020 | 82 | 0 | 0 | 0.000000 | 50.00 |
| 374 | 29721 | 17493 | 2657 | 0.228660 | 56 | 24 | 2 | 0.170732 | 18.26 |
| 375 | 49870 | 1 | 0 | 0.000010 | 82 | 0 | 0 | 0.000000 | 50.00 |
| 376 | 49870 | 1 | 0 | 0.000010 | 82 | 0 | 0 | 0.000000 | 50.00 |
| 377 | 49869 | 2 | 0 | 0.000020 | 82 | 0 | 0 | 0.000000 | 50.00 |
| 378 | 49870 | 1 | 0 | 0.000010 | 82 | 0 | 0 | 0.000000 | 50.00 |
| 379 | 49870 | 1 | 0 | 0.000010 | 82 | 0 | 0 | 0.000000 | 50.00 |
| 380 | 49865 | 6 | 0 | 0.000060 | 82 | 0 | 0 | 0.000000 | 49.99 |
| 381 | 49870 | 1 | 0 | 0.000010 | 82 | 0 | 0 | 0.000000 | 50.00 |
| 382 | 49868 | 3 | 0 | 0.000030 | 82 | 0 | 0 | 0.000000 | 30.00 |
| 383 | 49869 | 2 | 0 | 0.000020 | 82 | 0 | 0 | 0.000000 | 30.00 |
| 384 | 49690 | 2 | 0 | 0.000020 | 82 | 0 | 0 | 0.000000 | 30.00 |
| 385 | 49690 | 175 | 1 | 0.001775 | 82 | 0 | 0 | 0.000000 | 29.81 |
| 386 | 49690 | 1 | 0 | 0.000010 | 82 | 0 | 0 | 0.000000 | 30.00 |
| 387 | 49690 | 1 | 0 | 0.000010 | 82 | 0 | 0 | 0.000000 | 30.00 |
| 388 | 49690 | 1 | 0 | 0.000010 | 82 | 0 | 0 | 0.000000 | 30.00 |
| 389 | 49870 | 1 | 0 | 0.000010 | 82 | 0 | 0 | 0.000000 | 30.00 |
| 390 | 49870 | 1 | 0 | 0.000010 | 82 | 0 | 0 | 0.000000 | 30.00 |
| 391 | 49868 | 3 | 0 | 0.000030 | 82 | 0 | 0 | 0.000000 | 30.00 |
| 392 | 49869 | 2 | 0 | 0.000020 | 82 | 0 | 0 | 0.000000 | 30.00 |
| 393 | 49870 | 1 | 0 | 0.000010 | 82 | 0 | 0 | 0.000000 | 30.00 |
| 394 | 49824 | 46 | 1 | 0.000481 | 82 | 0 | 0 | 0.000000 | 29.95 |
| 395 | 49869 | 2 | 0 | 0.000020 | 82 | 0 | 0 | 0.000000 | 30.00 |
| 396 | 0 | 1 | 49868 | 0.999990 | 0 | 0 | 82 | 1.000000 | 30.00 |
| 397 | 49869 | 2 | 0 | 0.000020 | 82 | 0 | 0 | 0.000000 | 30.00 |
| 398 | 49869 | 2 | 0 | 0.000020 | 82 | 0 | 0 | 0.000000 | 30.00 |
| 399 | 49870 | 1 | 0 | 0.000010 | 82 | 0 | 0 | 0.000000 | 30.00 |
| 400 | 49822 | 4 | 0 | 0.000040 | 82 | 0 | 0 | 0.000000 | 30.00 |
| 401 | 49863 | 8 | 0 | 0.000080 | 82 | 0 | 0 | 0.000000 | 29.99 |
| 402 | 49869 | 2 | 0 | 0.000020 | 82 | 0 | 0 | 0.000000 | 30.00 |
| 403 | 49868 | 3 | 0 | 0.000030 | 82 | 0 | 0 | 0.000000 | 30.00 |
| 404 | 49866 | 2 | 0 | 0.000020 | 82 | 0 | 0 | 0.000000 | 30.00 |
| 405 | 49870 | 1 | 0 | 0.000010 | 82 | 0 | 0 | 0.000000 | 30.00 |
| 406 | 49870 | 1 | 0 | 0.000010 | 82 | 0 | 0 | 0.000000 | 30.00 |
| 407 | 49868 | 3 | 0 | 0.000030 | 82 | 0 | 0 | 0.000000 | 30.00 |
| 408 | 49867 | 4 | 0 | 0.000040 | 82 | 0 | 0 | 0.000000 | 30.00 |
| 409 | 24966 | 20452 | 4453 | 0.294339 | 43 | 33 | 6 | 0.274390 | 2.52 |
| 410 | 49870 | 1 | 0 | 0.000010 | 82 | 0 | 0 | 0.000000 | 50.00 |
| 411 | 49867 | 4 | 0 | 0.000040 | 82 | 0 | 0 | 0.000000 | 49.99 |
| 412 | 49866 | 5 | 0 | 0.000050 | 82 | 0 | 0 | 0.000000 | 49.99 |
| 413 | 49869 | 2 | 0 | 0.000020 | 82 | 0 | 0 | 0.000000 | 50.00 |
| 414 | 49860 | 1 | 0 | 0.000010 | 82 | 0 | 0 | 0.000000 | 50.00 |
| 415 | 49869 | 2 | 0 | 0.000020 | 82 | 0 | 0 | 0.000000 | 50.00 |
| 416 | 49869 | 2 | 0 | 0.000020 | 82 | 0 | 0 | 0.000000 | 50.00 |
| 417 | 49869 | 2 | 0 | 0.000020 | 82 | 0 | 0 | 0.000000 | 50.00 |
| 418 | 49862 | 9 | 0 | 0.000090 | 82 | 0 | 0 | 0.000000 | 49.98 |
| 419 | 49870 | 1 | 0 | 0.000010 | 82 | 0 | 0 | 0.000000 | 50.00 |
| 420 | 49870 | 1 | 0 | 0.000010 | 82 | 0 | 0 | 0.000000 | 50.00 |
| 421 | 49870 | 1 | 0 | 0.000010 | 82 | 0 | 0 | 0.000000 | 50.00 |
| 422 | 49869 | 1 | 0 | 0.000010 | 82 | 0 | 0 | 0.000000 | 199.99 |
| 423 | 49869 | 1 | 0 | 0.000010 | 82 | 0 | 0 | 0.000000 | 50.00 |
| 424 | 49869 | 1 | 0 | 0.000010 | 82 | 0 | 0 | 0.000000 | 50.00 |
| 425 | 49867 | 3 | 0 | 0.000030 | 82 | 0 | 0 | 0.000000 | 49.99 |
| 426 | 49869 | 1 | 0 | 0.000010 | 82 | 0 | 0 | 0.000000 | 50.00 |
| 427 | 49865 | 5 | 0 | 0.000050 | 82 | 0 | 0 | 0.000000 | 49.99 |
| 428 | 49869 | 1 | 0 | 0.000010 | 82 | 0 | 0 | 0.000000 | 50.00 |
| 429 | 49868 | 2 | 0 | 0.000020 | 82 | 0 | 0 | 0.000000 | 50.00 |
| 430 | 49870 | 1 | 0 | 0.000010 | 82 | 0 | 0 | 0.000000 | 50.00 |
| 431 | 49870 | 1 | 0 | 0.000010 | 82 | 0 | 0 | 0.000000 | 30.00 |
| 432 | 49870 | 1 | 0 | 0.000010 | 82 | 0 | 0 | 0.000000 | 30.00 |
| 433 | 49870 | 1 | 0 | 0.000010 | 82 | 0 | 0 | 0.000000 | 30.00 |
| 434 | 49870 | 1 | 0 | 0.000010 | 82 | 0 | 0 | 0.000000 | 30.00 |
| 435 | 49862 | 9 | 0 | 0.000090 | 82 | 0 | 0 | 0.000000 | 29.99 |
| 436 | 49799 | 71 | 1 | 0.000732 | 82 | 0 | 0 | 0.000000 | 29.92 |
| 437 | 49865 | 5 | 0 | 0.000050 | 82 | 0 | 0 | 0.000000 | 29.99 |
| 438 | 49849 | 21 | 0 | 0.000211 | 82 | 0 | 0 | 0.000000 | 29.98 |
| 439 | 49766 | 98 | 2 | 0.001023 | 82 | 0 | 0 | 0.000000 | 29.89 |
| 440 | 0 | 1 | 49864 | 0.999990 | 0 | 0 | 82 | 1.000000 | 30.00 |
| 441 | 49864 | 1 | 0 | 0.000010 | 82 | 0 | 0 | 0.000000 | 30.00 |
| 442 | 47397 | 2419 | 42 | 0.025101 | 79 | 3 | 0 | 0.018293 | 27.36 |
| 443 | 49373 | 36 | 0 | 0.000364 | 82 | 0 | 0 | 0.000000 | 29.96 |
| 444 | 49826 | 1 | 0 | 0.000010 | 82 | 0 | 0 | 0.000000 | 30.00 |
| 445 | 49772 | 68 | 1 | 0.000702 | 81 | 1 | 0 | 0.006098 | 29.92 |
| 446 | 49863 | 1 | 0 | 0.000010 | 82 | 0 | 0 | 0.000000 | 30.00 |
| 447 | 49867 | 2 | 0 | 0.000020 | 82 | 0 | 0 | 0.000000 | 30.00 |
| 448 | 49865 | 5 | 0 | 0.000050 | 82 | 0 | 0 | 0.000000 | 29.99 |
| 449 | 49869 | 2 | 0 | 0.000020 | 82 | 0 | 0 | 0.000000 | 30.00 |
| 450 | 49869 | 2 | 0 | 0.000020 | 82 | 0 | 0 | 0.000000 | 30.00 |
| 451 | 49870 | 1 | 0 | 0.000010 | 82 | 0 | 0 | 0.000000 | 50.00 |
| 452 | 49870 | 1 | 0 | 0.000010 | 82 | 0 | 0 | 0.000000 | 50.00 |
| 453 | 49870 | 1 | 0 | 0.000010 | 82 | 0 | 0 | 0.000000 | 50.00 |
| 454 | 49869 | 2 | 0 | 0.000020 | 82 | 0 | 0 | 0.000000 | 50.00 |
| 455 | 49866 | 5 | 0 | 0.000050 | 82 | 0 | 0 | 0.000000 | 49.99 |
| 456 | 49869 | 1 | 0 | 0.000010 | 82 | 0 | 0 | 0.000000 | 50.00 |
| 457 | 49867 | 3 | 0 | 0.000030 | 82 | 0 | 0 | 0.000000 | 49.99 |
| 458 | 49868 | 1 | 0 | 0.000010 | 82 | 0 | 0 | 0.000000 | 100.00 |
| 459 | 49870 | 1 | 0 | 0.000010 | 82 | 0 | 0 | 0.000000 | 50.00 |
| 460 | 49837 | 17 | 0 | 0.000170 | 82 | 0 | 0 | 0.000000 | 299.82 |
| 461 | 49870 | 1 | 0 | 0.000010 | 82 | 0 | 0 | 0.000000 | 50.00 |
| 462 | 49870 | 1 | 0 | 0.000010 | 82 | 0 | 0 | 0.000000 | 50.00 |
| 463 | 49870 | 1 | 0 | 0.000010 | 82 | 0 | 0 | 0.000000 | 50.00 |
| 464 | 49870 | 1 | 0 | 0.000010 | 82 | 0 | 0 | 0.000000 | 50.00 |
| 465 | 49870 | 1 | 0 | 0.000010 | 82 | 0 | 0 | 0.000000 | 50.00 |
| 466 | 49870 | 1 | 0 | 0.000010 | 82 | 0 | 0 | 0.000000 | 30.00 |
| 467 | 49849 | 15 | 0 | 0.000150 | 82 | 0 | 0 | 0.000000 | 29.98 |
| 468 | 48623 | 1213 | 9 | 0.012348 | 81 | 1 | 0 | 0.006098 | 28.68 |
| 469 | 49725 | 1 | 0 | 0.000010 | 82 | 0 | 0 | 0.000000 | 30.00 |
| 470 | 49725 | 1 | 0 | 0.000010 | 82 | 0 | 0 | 0.000000 | 30.00 |
| 471 | 49826 | 1 | 0 | 0.000010 | 82 | 0 | 0 | 0.000000 | 30.00 |
| 472 | 49840 | 1 | 0 | 0.000010 | 82 | 0 | 0 | 0.000000 | 30.00 |
| 473 | 49848 | 6 | 0 | 0.000060 | 82 | 0 | 0 | 0.000000 | 29.99 |
| 474 | 49842 | 17 | 0 | 0.000170 | 82 | 0 | 0 | 0.000000 | 29.98 |
| 475 | 49870 | 1 | 0 | 0.000010 | 82 | 0 | 0 | 0.000000 | 30.00 |
| 476 | 49870 | 1 | 0 | 0.000010 | 82 | 0 | 0 | 0.000000 | 30.00 |
| 477 | 49628 | 243 | 0 | 0.002436 | 82 | 0 | 0 | 0.000000 | 29.74 |
| 478 | 49870 | 1 | 0 | 0.000010 | 82 | 0 | 0 | 0.000000 | 30.00 |
| 479 | 49870 | 1 | 0 | 0.000010 | 82 | 0 | 0 | 0.000000 | 30.00 |
| 480 | 49870 | 1 | 0 | 0.000010 | 82 | 0 | 0 | 0.000000 | 30.00 |
| 481 | 49856 | 15 | 0 | 0.000150 | 82 | 0 | 0 | 0.000000 | 29.98 |
| 482 | 49867 | 4 | 0 | 0.000040 | 82 | 0 | 0 | 0.000000 | 30.00 |
| 483 | 49868 | 3 | 0 | 0.000030 | 82 | 0 | 0 | 0.000000 | 30.00 |
| 484 | 49870 | 1 | 0 | 0.000010 | 82 | 0 | 0 | 0.000000 | 30.00 |
| 485 | 49859 | 12 | 0 | 0.000120 | 82 | 0 | 0 | 0.000000 | 29.99 |
| 486 | 49869 | 1 | 0 | 0.000010 | 82 | 0 | 0 | 0.000000 | 30.00 |
| 487 | 49869 | 1 | 0 | 0.000010 | 82 | 0 | 0 | 0.000000 | 30.00 |
| 488 | 49870 | 1 | 0 | 0.000010 | 82 | 0 | 0 | 0.000000 | 30.00 |
| 489 | 49870 | 1 | 0 | 0.000010 | 82 | 0 | 0 | 0.000000 | 50.00 |
| 490 | 49870 | 1 | 0 | 0.000010 | 82 | 0 | 0 | 0.000000 | 50.00 |
| 491 | 49870 | 1 | 0 | 0.000010 | 82 | 0 | 0 | 0.000000 | 50.00 |
| 492 | 42088 | 7391 | 392 | 0.081961 | 68 | 13 | 1 | 0.091463 | 36.45 |
| 493 | 48941 | 925 | 5 | 0.009374 | 81 | 1 | 0 | 0.006098 | 48.33 |
| 494 | 49849 | 5 | 0 | 0.000050 | 82 | 0 | 0 | 0.000000 | 99.98 |
| 495 | 49870 | 1 | 0 | 0.000010 | 82 | 0 | 0 | 0.000000 | 50.00 |
| 496 | 49867 | 4 | 0 | 0.000040 | 82 | 0 | 0 | 0.000000 | 49.99 |
| 497 | 49869 | 2 | 0 | 0.000020 | 82 | 0 | 0 | 0.000000 | 50.00 |
| 498 | 49869 | 2 | 0 | 0.000020 | 82 | 0 | 0 | 0.000000 | 50.00 |
| 499 | 49854 | 17 | 0 | 0.000170 | 82 | 0 | 0 | 0.000000 | 49.97 |
| 500 | 49865 | 6 | 0 | 0.000060 | 82 | 0 | 0 | 0.000000 | 49.99 |
| 501 | 48479 | 1377 | 15 | 0.014106 | 80 | 2 | 0 | 0.012195 | 47.50 |
| 502 | 49870 | 1 | 0 | 0.000010 | 82 | 0 | 0 | 0.000000 | 199.99 |
| 503 | 49870 | 1 | 0 | 0.000010 | 82 | 0 | 0 | 0.000000 | 50.00 |
| 504 | 49870 | 1 | 0 | 0.000010 | 82 | 0 | 0 | 0.000000 | 50.00 |
| 505 | 49869 | 2 | 0 | 0.000020 | 82 | 0 | 0 | 0.000000 | 50.00 |
| 506 | 49870 | 1 | 0 | 0.000010 | 82 | 0 | 0 | 0.000000 | 50.00 |
| 507 | 49862 | 9 | 0 | 0.000090 | 82 | 0 | 0 | 0.000000 | 49.98 |
| 508 | 49862 | 3 | 0 | 0.000030 | 82 | 0 | 0 | 0.000000 | 199.98 |
| 509 | 49862 | 2 | 0 | 0.000020 | 82 | 0 | 0 | 0.000000 | 299.98 |
| 510 | 49864 | 1 | 0 | 0.000010 | 82 | 0 | 0 | 0.000000 | 50.00 |
| 511 | 49860 | 11 | 0 | 0.000110 | 82 | 0 | 0 | 0.000000 | 49.98 |
| 512 | 49870 | 1 | 0 | 0.000010 | 82 | 0 | 0 | 0.000000 | 50.00 |
| 513 | 49868 | 3 | 0 | 0.000030 | 82 | 0 | 0 | 0.000000 | 49.99 |
| 514 | 49870 | 1 | 0 | 0.000010 | 82 | 0 | 0 | 0.000000 | 50.00 |
| 515 | 49870 | 1 | 0 | 0.000010 | 82 | 0 | 0 | 0.000000 | 50.00 |
| 516 | 49870 | 1 | 0 | 0.000010 | 82 | 0 | 0 | 0.000000 | 50.00 |
| 517 | 49825 | 46 | 0 | 0.000461 | 82 | 0 | 0 | 0.000000 | 49.92 |
| 518 | 49870 | 1 | 0 | 0.000010 | 82 | 0 | 0 | 0.000000 | 50.00 |
| 519 | 49867 | 4 | 0 | 0.000040 | 82 | 0 | 0 | 0.000000 | 49.99 |
| 520 | 49869 | 2 | 0 | 0.000020 | 82 | 0 | 0 | 0.000000 | 50.00 |
| 521 | 49869 | 2 | 0 | 0.000020 | 82 | 0 | 0 | 0.000000 | 50.00 |
| 522 | 49870 | 1 | 0 | 0.000010 | 82 | 0 | 0 | 0.000000 | 50.00 |
| 523 | 49869 | 2 | 0 | 0.000020 | 82 | 0 | 0 | 0.000000 | 50.00 |
| 524 | 49838 | 33 | 0 | 0.000331 | 82 | 0 | 0 | 0.000000 | 49.94 |
| 525 | 49868 | 3 | 0 | 0.000030 | 82 | 0 | 0 | 0.000000 | 49.99 |
| 526 | 49867 | 4 | 0 | 0.000040 | 82 | 0 | 0 | 0.000000 | 49.99 |
| 527 | 49860 | 11 | 0 | 0.000110 | 82 | 0 | 0 | 0.000000 | 199.92 |
| 528 | 49603 | 267 | 1 | 0.002697 | 82 | 0 | 0 | 0.000000 | 49.52 |
| 529 | 49864 | 1 | 0 | 0.000010 | 82 | 0 | 0 | 0.000000 | 50.00 |
| 530 | 49868 | 3 | 0 | 0.000030 | 82 | 0 | 0 | 0.000000 | 49.99 |
| 531 | 49870 | 1 | 0 | 0.000010 | 82 | 0 | 0 | 0.000000 | 50.00 |
| 532 | 49868 | 3 | 0 | 0.000030 | 82 | 0 | 0 | 0.000000 | 49.99 |
| 533 | 49869 | 2 | 0 | 0.000020 | 82 | 0 | 0 | 0.000000 | 50.00 |
| 534 | 49852 | 19 | 0 | 0.000190 | 82 | 0 | 0 | 0.000000 | 49.97 |
| 535 | 49870 | 1 | 0 | 0.000010 | 82 | 0 | 0 | 0.000000 | 50.00 |
| 536 | 49870 | 1 | 0 | 0.000010 | 82 | 0 | 0 | 0.000000 | 50.00 |
| 537 | 49869 | 2 | 0 | 0.000020 | 82 | 0 | 0 | 0.000000 | 50.00 |
| 538 | 49870 | 1 | 0 | 0.000010 | 82 | 0 | 0 | 0.000000 | 50.00 |
| 539 | 49867 | 4 | 0 | 0.000040 | 82 | 0 | 0 | 0.000000 | 49.99 |
| 540 | 49870 | 1 | 0 | 0.000010 | 82 | 0 | 0 | 0.000000 | 50.00 |
| 541 | 49869 | 2 | 0 | 0.000020 | 82 | 0 | 0 | 0.000000 | 50.00 |
| 542 | 49869 | 2 | 0 | 0.000020 | 82 | 0 | 0 | 0.000000 | 50.00 |
| 543 | 49861 | 10 | 0 | 0.000100 | 82 | 0 | 0 | 0.000000 | 29.99 |
| 544 | 49867 | 1 | 0 | 0.000010 | 82 | 0 | 0 | 0.000000 | 30.00 |
| 545 | 49860 | 11 | 0 | 0.000110 | 82 | 0 | 0 | 0.000000 | 29.99 |
| 546 | 49867 | 2 | 0 | 0.000020 | 82 | 0 | 0 | 0.000000 | 30.00 |
| 547 | 49867 | 1 | 0 | 0.000010 | 82 | 0 | 0 | 0.000000 | 30.00 |
| 548 | 49862 | 1 | 0 | 0.000010 | 82 | 0 | 0 | 0.000000 | 30.00 |
| 549 | 49862 | 1 | 0 | 0.000010 | 82 | 0 | 0 | 0.000000 | 30.00 |
| 550 | 49859 | 4 | 0 | 0.000040 | 82 | 0 | 0 | 0.000000 | 30.00 |
| 551 | 49857 | 1 | 0 | 0.000010 | 82 | 0 | 0 | 0.000000 | 30.00 |
| 552 | 49764 | 91 | 0 | 0.000913 | 82 | 0 | 0 | 0.000000 | 29.90 |
| 553 | 49796 | 1 | 0 | 0.000010 | 81 | 0 | 0 | 0.000000 | 30.00 |
| 554 | 49751 | 1 | 0 | 0.000010 | 81 | 0 | 0 | 0.000000 | 30.00 |
| 555 | 49617 | 2 | 0 | 0.000020 | 81 | 0 | 0 | 0.000000 | 30.00 |
| 556 | 49612 | 1 | 0 | 0.000010 | 81 | 0 | 0 | 0.000000 | 30.00 |
| 557 | 49792 | 1 | 0 | 0.000010 | 82 | 0 | 0 | 0.000000 | 30.00 |
| 558 | 49842 | 1 | 0 | 0.000010 | 82 | 0 | 0 | 0.000000 | 30.00 |
| 559 | 49839 | 5 | 0 | 0.000050 | 82 | 0 | 0 | 0.000000 | 29.99 |
| 560 | 49858 | 3 | 0 | 0.000030 | 82 | 0 | 0 | 0.000000 | 30.00 |
| 561 | 49869 | 2 | 0 | 0.000020 | 82 | 0 | 0 | 0.000000 | 30.00 |
| 562 | 49865 | 6 | 0 | 0.000060 | 82 | 0 | 0 | 0.000000 | 49.99 |
| 563 | 49868 | 3 | 0 | 0.000030 | 82 | 0 | 0 | 0.000000 | 49.99 |
| 564 | 49870 | 1 | 0 | 0.000010 | 82 | 0 | 0 | 0.000000 | 50.00 |
| 565 | 49869 | 2 | 0 | 0.000020 | 82 | 0 | 0 | 0.000000 | 50.00 |
| 566 | 49870 | 1 | 0 | 0.000010 | 82 | 0 | 0 | 0.000000 | 50.00 |
| 567 | 49864 | 3 | 0 | 0.000030 | 82 | 0 | 0 | 0.000000 | 30.00 |
| 568 | 49834 | 1 | 0 | 0.000010 | 82 | 0 | 0 | 0.000000 | 30.00 |
| 569 | 49852 | 1 | 0 | 0.000010 | 82 | 0 | 0 | 0.000000 | 30.00 |
| 570 | 49770 | 3 | 0 | 0.000030 | 82 | 0 | 0 | 0.000000 | 30.00 |
| 571 | 49339 | 1 | 0 | 0.000010 | 82 | 0 | 0 | 0.000000 | 30.00 |
| 572 | 49169 | 13 | 0 | 0.000132 | 82 | 0 | 0 | 0.000000 | 29.99 |
| 573 | 49159 | 1 | 0 | 0.000010 | 82 | 0 | 0 | 0.000000 | 30.00 |
| 574 | 49870 | 1 | 0 | 0.000010 | 82 | 0 | 0 | 0.000000 | 30.00 |
| 575 | 49870 | 1 | 0 | 0.000010 | 82 | 0 | 0 | 0.000000 | 30.00 |
| 576 | 49866 | 1 | 0 | 0.000010 | 82 | 0 | 0 | 0.000000 | 30.00 |
| 577 | 49845 | 26 | 0 | 0.000261 | 82 | 0 | 0 | 0.000000 | 29.97 |
| 578 | 49867 | 4 | 0 | 0.000040 | 82 | 0 | 0 | 0.000000 | 30.00 |
| 579 | 49870 | 1 | 0 | 0.000010 | 82 | 0 | 0 | 0.000000 | 30.00 |
| 580 | 49870 | 1 | 0 | 0.000010 | 82 | 0 | 0 | 0.000000 | 30.00 |
| 581 | 49870 | 1 | 0 | 0.000010 | 82 | 0 | 0 | 0.000000 | 30.00 |
| 582 | 49870 | 1 | 0 | 0.000010 | 82 | 0 | 0 | 0.000000 | 30.00 |
| 583 | 49839 | 32 | 0 | 0.000321 | 82 | 0 | 0 | 0.000000 | 29.97 |
| 584 | 49856 | 15 | 0 | 0.000150 | 82 | 0 | 0 | 0.000000 | 29.98 |
| 585 | 49870 | 1 | 0 | 0.000010 | 82 | 0 | 0 | 0.000000 | 30.00 |
| 586 | 49870 | 1 | 0 | 0.000010 | 82 | 0 | 0 | 0.000000 | 30.00 |
| 587 | 49870 | 1 | 0 | 0.000010 | 82 | 0 | 0 | 0.000000 | 30.00 |
| 588 | 49870 | 1 | 0 | 0.000010 | 82 | 0 | 0 | 0.000000 | 30.00 |
| 589 | 49827 | 44 | 0 | 0.000441 | 82 | 0 | 0 | 0.000000 | 29.95 |
| 590 | 49870 | 1 | 0 | 0.000010 | 82 | 0 | 0 | 0.000000 | 30.00 |
| 591 | 49869 | 2 | 0 | 0.000020 | 82 | 0 | 0 | 0.000000 | 30.00 |
| 592 | 49867 | 4 | 0 | 0.000040 | 82 | 0 | 0 | 0.000000 | 30.00 |
| 593 | 49869 | 2 | 0 | 0.000020 | 82 | 0 | 0 | 0.000000 | 30.00 |
| 594 | 49870 | 1 | 0 | 0.000010 | 82 | 0 | 0 | 0.000000 | 30.00 |
| 595 | 49870 | 1 | 0 | 0.000010 | 82 | 0 | 0 | 0.000000 | 30.00 |
| 596 | 49870 | 1 | 0 | 0.000010 | 82 | 0 | 0 | 0.000000 | 30.00 |
| 597 | 49868 | 3 | 0 | 0.000030 | 82 | 0 | 0 | 0.000000 | 30.00 |
| 598 | 49870 | 1 | 0 | 0.000010 | 82 | 0 | 0 | 0.000000 | 30.00 |
| 599 | 49870 | 1 | 0 | 0.000010 | 82 | 0 | 0 | 0.000000 | 30.00 |
| 600 | 49869 | 2 | 0 | 0.000020 | 82 | 0 | 0 | 0.000000 | 30.00 |
| 601 | 49870 | 1 | 0 | 0.000010 | 82 | 0 | 0 | 0.000000 | 30.00 |
| 602 | 49870 | 1 | 0 | 0.000010 | 82 | 0 | 0 | 0.000000 | 30.00 |
| 603 | 49868 | 3 | 0 | 0.000030 | 82 | 0 | 0 | 0.000000 | 30.00 |
| 604 | 49870 | 1 | 0 | 0.000010 | 82 | 0 | 0 | 0.000000 | 30.00 |
| 605 | 49868 | 3 | 0 | 0.000030 | 82 | 0 | 0 | 0.000000 | 30.00 |
| 606 | 49870 | 1 | 0 | 0.000010 | 82 | 0 | 0 | 0.000000 | 30.00 |
| 607 | 49860 | 11 | 0 | 0.000110 | 82 | 0 | 0 | 0.000000 | 29.99 |
| 608 | 49870 | 1 | 0 | 0.000010 | 82 | 0 | 0 | 0.000000 | 30.00 |
| 609 | 49870 | 1 | 0 | 0.000010 | 82 | 0 | 0 | 0.000000 | 30.00 |
| 610 | 49868 | 3 | 0 | 0.000030 | 82 | 0 | 0 | 0.000000 | 30.00 |
| 611 | 49854 | 17 | 0 | 0.000170 | 82 | 0 | 0 | 0.000000 | 29.98 |
| 612 | 49870 | 1 | 0 | 0.000010 | 82 | 0 | 0 | 0.000000 | 30.00 |
| 613 | 49870 | 1 | 0 | 0.000010 | 82 | 0 | 0 | 0.000000 | 30.00 |
| 614 | 49870 | 1 | 0 | 0.000010 | 82 | 0 | 0 | 0.000000 | 30.00 |
| 615 | 49842 | 29 | 0 | 0.000291 | 82 | 0 | 0 | 0.000000 | 29.97 |
| 616 | 49865 | 5 | 0 | 0.000050 | 82 | 0 | 0 | 0.000000 | 29.99 |
| 617 | 49867 | 1 | 0 | 0.000010 | 82 | 0 | 0 | 0.000000 | 30.00 |
| 618 | 49870 | 1 | 0 | 0.000010 | 82 | 0 | 0 | 0.000000 | 30.00 |
| 619 | 49870 | 1 | 0 | 0.000010 | 82 | 0 | 0 | 0.000000 | 30.00 |
| 620 | 49868 | 3 | 0 | 0.000030 | 82 | 0 | 0 | 0.000000 | 30.00 |
| 621 | 49869 | 2 | 0 | 0.000020 | 82 | 0 | 0 | 0.000000 | 30.00 |
| 622 | 49868 | 3 | 0 | 0.000030 | 82 | 0 | 0 | 0.000000 | 30.00 |
| 623 | 49696 | 175 | 0 | 0.001755 | 82 | 0 | 0 | 0.000000 | 29.81 |
| 624 | 49870 | 1 | 0 | 0.000010 | 82 | 0 | 0 | 0.000000 | 30.00 |
| 625 | 49870 | 1 | 0 | 0.000010 | 82 | 0 | 0 | 0.000000 | 30.00 |
| 626 | 49870 | 1 | 0 | 0.000010 | 82 | 0 | 0 | 0.000000 | 30.00 |
| 627 | 49870 | 1 | 0 | 0.000010 | 82 | 0 | 0 | 0.000000 | 30.00 |
| 628 | 49870 | 1 | 0 | 0.000010 | 82 | 0 | 0 | 0.000000 | 30.00 |
| 629 | 49866 | 5 | 0 | 0.000050 | 82 | 0 | 0 | 0.000000 | 29.99 |
| 630 | 49870 | 1 | 0 | 0.000010 | 82 | 0 | 0 | 0.000000 | 30.00 |
| 631 | 49867 | 4 | 0 | 0.000040 | 82 | 0 | 0 | 0.000000 | 30.00 |
| 632 | 49870 | 1 | 0 | 0.000010 | 82 | 0 | 0 | 0.000000 | 30.00 |
| 633 | 49864 | 7 | 0 | 0.000070 | 82 | 0 | 0 | 0.000000 | 49.99 |
| 634 | 49869 | 1 | 0 | 0.000010 | 82 | 0 | 0 | 0.000000 | 199.99 |
| 635 | 49869 | 1 | 0 | 0.000010 | 82 | 0 | 0 | 0.000000 | 199.99 |
| 636 | 49865 | 6 | 0 | 0.000060 | 82 | 0 | 0 | 0.000000 | 49.99 |
| 637 | 49861 | 10 | 0 | 0.000100 | 82 | 0 | 0 | 0.000000 | 49.98 |
| 638 | 49869 | 2 | 0 | 0.000020 | 82 | 0 | 0 | 0.000000 | 50.00 |
| 639 | 18274 | 23761 | 7836 | 0.395350 | 25 | 39 | 18 | 0.457317 | 6.97 |
| 640 | 48668 | 1194 | 9 | 0.012151 | 82 | 0 | 0 | 0.000000 | 47.84 |
| 641 | 49870 | 1 | 0 | 0.000010 | 82 | 0 | 0 | 0.000000 | 199.99 |
| 642 | 49870 | 1 | 0 | 0.000010 | 82 | 0 | 0 | 0.000000 | 50.00 |
| 643 | 49869 | 2 | 0 | 0.000020 | 82 | 0 | 0 | 0.000000 | 50.00 |
| 644 | 49869 | 2 | 0 | 0.000020 | 82 | 0 | 0 | 0.000000 | 50.00 |
| 645 | 49869 | 2 | 0 | 0.000020 | 82 | 0 | 0 | 0.000000 | 50.00 |
| 646 | 49864 | 1 | 0 | 0.000010 | 82 | 0 | 0 | 0.000000 | 50.00 |
| 647 | 49870 | 1 | 0 | 0.000010 | 82 | 0 | 0 | 0.000000 | 50.00 |
| 648 | 49870 | 1 | 0 | 0.000010 | 82 | 0 | 0 | 0.000000 | 50.00 |
| 649 | 49868 | 3 | 0 | 0.000030 | 82 | 0 | 0 | 0.000000 | 49.99 |
| 650 | 49870 | 1 | 0 | 0.000010 | 82 | 0 | 0 | 0.000000 | 50.00 |
| 651 | 49870 | 1 | 0 | 0.000010 | 82 | 0 | 0 | 0.000000 | 50.00 |
| 652 | 49870 | 1 | 0 | 0.000010 | 82 | 0 | 0 | 0.000000 | 50.00 |
| 653 | 49869 | 1 | 0 | 0.000010 | 82 | 0 | 0 | 0.000000 | 50.00 |
| 654 | 49870 | 1 | 0 | 0.000010 | 82 | 0 | 0 | 0.000000 | 50.00 |
| 655 | 49866 | 2 | 0 | 0.000020 | 82 | 0 | 0 | 0.000000 | 50.00 |
| 656 | 49870 | 1 | 0 | 0.000010 | 82 | 0 | 0 | 0.000000 | 50.00 |
| 657 | 49870 | 1 | 0 | 0.000010 | 82 | 0 | 0 | 0.000000 | 50.00 |
| 658 | 49870 | 1 | 0 | 0.000010 | 82 | 0 | 0 | 0.000000 | 50.00 |
